# Supplementary material for: Epigenetic Silencing of miRNA-338-5p and miRNA-421 Drives SPINK1-Positive Prostate Cancer
Source: Oxford University Press journal article supplement (doi:10.1158/1078-0432.ccr-18-3230), 2018-12-26
Supplement: 10780432ccr183230-sup-209829_2_table_5198690_pj5hmf.xlsx [file 10780432ccr183230-sup-209829_2_table_5198690_pj5hmf.xlsx]

## Sheet: miR-338-5p and miR-421 Down
Supplementary Table S2: miR-338-5p and miR-421 common downregulated biological processes predicted by DAVID analysis.
Category	Term	Count	P-Value	Genes	Benjamini	FDR
GOTERM_BP_ALL	GO:1901360~organic cyclic compound metabolic process	223	6.23494e-08	LDHB, XRCC2, CITED4, UXS1, CUL3, DDX17, CDCA7, PPP1R1B, INSIG1, LSM3, PTBP3, PTBP2, OGT, CCNA2, AADAT, MTERF1, GTPBP4, ZNF100, MYH3, EEPD1, CTDSPL2, REC8, MTF2, PRDM6, PIAS1, EIF2AK2, ZNF41, GC, SRSF10, SRSF11, HMGCS1, HSPA1B, GPD1L, ARNTL2, POLQ, NR1H4, PRPF40A, MAP2K1, SMAD2, ATR, METTL14, NUP62, DCP1A, SUPT16H, RAD54B, UTP20, IDI1, NAP1L1, TMEM161B, TRMT10C, BOD1L1, HPDL, FANCM, WDR36, ZNF148,…	0.000334075	0.000119521
GOTERM_BP_ALL	GO:0090304~nucleic acid metabolic process	189	9.42357e-07	XPO1, XRCC2, PRPF4B, ZNF823, TBK1, SNRPD1, CITED4, KANK2, ESF1, CUL3, DDX17, CDCA7, DDX23, CASP8AP2, SRRM4, PPP1R1B, INSIG1, PSIP1, SRRM1, ZNF443, PTBP3, LSM3, PTBP2, OGT, CCNA2, RC3H1, GNL3, MTERF1, SNRPA1, GTPBP4, ZNF100, MYO6, FOXN2, ZNF816, EEPD1, ELL2, CTDSPL2, SUZ12, SLTM, REC8, TRIM33, MTF2, PRDM6, DNTTIP2, PIAS1, EIF2AK2, NFE2L3, SNRPF, ZNF41, HMGB1, SRSF10, ONECUT3, ONECUT2, SRSF11, TIPI…	0.00252186	0.00180644
GOTERM_BP_ALL	GO:0006139~nucleobase-containing compound metabolic process	206	1.8487e-06	LDHB, XRCC2, CITED4, UXS1, CUL3, DDX17, CDCA7, PPP1R1B, INSIG1, LSM3, PTBP3, PTBP2, OGT, CCNA2, MTERF1, GTPBP4, ZNF100, MYH3, EEPD1, CTDSPL2, REC8, MTF2, PRDM6, PIAS1, EIF2AK2, ZNF41, SRSF10, SRSF11, HSPA1B, GPD1L, ARNTL2, POLQ, NR1H4, PRPF40A, MAP2K1, SMAD2, ATR, METTL14, NUP62, DCP1A, SUPT16H, RAD54B, UTP20, NAP1L1, TMEM161B, TRMT10C, BOD1L1, FANCM, WDR36, ZNF148, ZNF146, ATP5O, HSF4, MYB, USP1…	0.00329695	0.0035438
GOTERM_BP_ALL	GO:0006725~cellular aromatic compound metabolic process	210	2.78647e-06	LDHB, XRCC2, CITED4, UXS1, CUL3, DDX17, CDCA7, PPP1R1B, INSIG1, LSM3, PTBP3, PTBP2, OGT, CCNA2, AADAT, MTERF1, GTPBP4, ZNF100, MYH3, EEPD1, CTDSPL2, REC8, MTF2, PRDM6, PIAS1, EIF2AK2, ZNF41, SRSF10, SRSF11, HSPA1B, GPD1L, ARNTL2, POLQ, NR1H4, PRPF40A, MAP2K1, SMAD2, ATR, METTL14, NUP62, DCP1A, SUPT16H, RAD54B, UTP20, NAP1L1, TMEM161B, TRMT10C, BOD1L1, HPDL, FANCM, WDR36, ZNF148, ZNF146, ATP5O, HS…	0.00372622	0.00534139
GOTERM_BP_ALL	GO:0046483~heterocycle metabolic process	208	3.80826e-06	LDHB, XRCC2, CITED4, UXS1, CUL3, DDX17, CDCA7, PPP1R1B, INSIG1, LSM3, PTBP3, PTBP2, OGT, CCNA2, AADAT, MTERF1, GTPBP4, ZNF100, MYH3, EEPD1, CTDSPL2, REC8, MTF2, PRDM6, PIAS1, EIF2AK2, ZNF41, SRSF10, SRSF11, HSPA1B, GPD1L, ARNTL2, POLQ, NR1H4, PRPF40A, MAP2K1, SMAD2, ATR, METTL14, NUP62, DCP1A, SUPT16H, RAD54B, UTP20, NAP1L1, TMEM161B, TRMT10C, BOD1L1, FANCM, WDR36, ZNF148, ZNF146, ATP5O, HSF4, MY…	0.00407338	0.00729998
GOTERM_BP_ALL	GO:0006260~DNA replication	24	4.64795e-06	CDK1, GTPBP4, CCDC88A, GMNN, NASP, TIPIN, NAP1L1, KIAA0101, BRIP1, WRN, RRM2B, ATR, SMC3, BOD1L1, FANCM, DNA2, TFAM, POLE2, SUPT16H, ZRANB3, POLG2, POLQ, FEN1, NFIB	0.0041428	0.00890951
GOTERM_BP_ALL	GO:0034641~cellular nitrogen compound metabolic process	223	7.6735e-06	LDHB, MRPL42, XRCC2, CITED4, UXS1, CUL3, DDX17, CDCA7, PPP1R1B, EIF1AX, COL4A3BP, INSIG1, LSM3, PTBP3, PTBP2, OGT, CCNA2, DDAH1, AADAT, MTERF1, GTPBP4, MRPL50, ZNF100, MYH3, EEPD1, CTDSPL2, REC8, MTF2, PRDM6, PIAS1, EIF2AK2, ZNF41, CHKA, SRSF10, SRSF11, HSPA1B, GPD1L, ARNTL2, POLQ, NR1H4, PRPF40A, MAP2K1, SMAD2, ATR, FXR1, METTL14, NUP62, DCP1A, SUPT16H, RAD54B, UTP20, NAP1L1, TMEM161B, TRMT10C, …	0.00585742	0.0147087
GOTERM_BP_ALL	GO:0006807~nitrogen compound metabolic process	234	1.37529e-05	LDHB, MRPL42, XRCC2, CITED4, UXS1, CUL3, DDX17, CDCA7, PPP1R1B, EIF1AX, COL4A3BP, INSIG1, LSM3, PTBP3, PTBP2, OGT, CCNA2, DDAH1, AADAT, MTERF1, GTPBP4, MRPL50, ZNF100, MYH3, EEPD1, CTDSPL2, REC8, MTF2, PRDM6, PIAS1, EIF2AK2, ZNF41, CHKA, SRSF10, SRSF11, HSPA1B, GPD1L, ARNTL2, POLQ, NR1H4, PRPF40A, MAP2K1, SMAD2, ATR, FXR1, METTL14, NUP62, DCP1A, SUPT16H, RAD54B, UTP20, NAP1L1, TMEM161B, TRMT10C, …	0.00917047	0.0263603
GOTERM_BP_ALL	GO:0044249~cellular biosynthetic process	209	2.81939e-05	MRPL42, XRCC2, CITED4, UXS1, CUL3, DDX17, CDCA7, AGPS, PPP1R1B, EIF1AX, COL4A3BP, INSIG1, OGT, CCNA2, DDAH1, MUC13, MTERF1, PDPR, GTPBP4, MRPL50, ZNF100, CTDSPL2, MTF2, PRDM6, PIAS1, EIF2AK2, ZNF41, CHKA, SRSF10, SRSF11, HMGCS1, HSPA1B, GPD1L, ARNTL2, POLQ, NR1H4, MAP2K1, SMAD2, ATR, FXR1, METTL14, NUP62, AVPR1A, SUPT16H, RAD54B, IDI1, NAP1L1, BOD1L1, FAR1, FANCM, AGPAT5, ZNF148, ZNF146, ATP5O, H…	0.016648	0.0540324
GOTERM_BP_ALL	GO:0051169~nuclear transport	30	4.02349e-05	XPO1, SRSF10, SRSF11, SNRPD1, AKR1C3, NPAP1, CEP57, AGT, PSIP1, SRRM1, TPR, TNPO1, NEMF, KHDRBS1, ABCE1, CDK1, UPF2, HSP90AA1, ANP32E, WRN, CTDSPL2, EIF4E, NUP62, RSRC1, NOP58, KPNA3, SNRPF, THOC2, CPSF2, MED1	0.0213315	0.0771
GOTERM_BP_ALL	GO:0009058~biosynthetic process	213	5.57198e-05	MRPL42, XRCC2, CITED4, UXS1, CUL3, DDX17, CDCA7, AGPS, PPP1R1B, EIF1AX, COL4A3BP, INSIG1, OGT, CCNA2, DDAH1, MUC13, AADAT, MTERF1, PDPR, GTPBP4, MRPL50, ZNF100, CTDSPL2, MTF2, PRDM6, PIAS1, EIF2AK2, ZNF41, CHKA, SRSF10, SRSF11, HMGCS1, HSPA1B, GPD1L, ARNTL2, POLQ, NR1H4, MAP2K1, SMAD2, ATR, FXR1, METTL14, NUP62, AVPR1A, SUPT16H, RAD54B, IDI1, NAP1L1, BOD1L1, FAR1, FANCM, AGPAT5, ZNF148, ZNF146, A…	0.0267813	0.106758
GOTERM_BP_ALL	GO:0016071~mRNA metabolic process	37	8.46796e-05	PRPF4B, SRSF10, NANOS1, SRSF11, SNRPD1, SKIV2L2, HSPA1B, PATL1, SRRM4, DDX23, SAFB, PSIP1, SRRM1, PTBP3, LSM3, PTBP2, RC3H1, HSPA8, PRPF40A, RBM26, KHDRBS1, SNRPA1, UPF2, EXOSC9, RBM41, SSB, SLTM, SNRNP48, EIF4E, METTL14, RPL22, RSRC1, DCP1A, ZRANB2, SNRPF, THOC2, CPSF2	0.0371119	0.162202
GOTERM_BP_ALL	GO:0008380~RNA splicing	26	0.000101286	PRPF4B, SRSF10, SRSF11, SNRPD1, SKIV2L2, HSPA1B, SRRM4, DDX23, PSIP1, SRRM1, LSM3, PTBP3, PTBP2, HSPA8, PRPF40A, KHDRBS1, SNRPA1, RBM41, SNRNP48, PPIG, METTL14, RSRC1, ZRANB2, SNRPF, THOC2, CPSF2	0.0408954	0.193981
GOTERM_BP_ALL	GO:0016070~RNA metabolic process	163	0.000125874	XPO1, PRPF4B, ZNF823, TBK1, SNRPD1, CITED4, KANK2, CUL3, ESF1, DDX17, CDCA7, DDX23, CASP8AP2, SRRM4, PPP1R1B, INSIG1, PSIP1, SRRM1, ZNF443, PTBP3, LSM3, PTBP2, OGT, CCNA2, RC3H1, GNL3, MTERF1, SNRPA1, GTPBP4, ZNF100, MYO6, FOXN2, ZNF816, ELL2, CTDSPL2, SUZ12, SLTM, TRIM33, MTF2, PRDM6, DNTTIP2, PIAS1, EIF2AK2, NFE2L3, SNRPF, ZNF41, HMGB1, SRSF10, ONECUT3, SRSF11, ONECUT2, HSPA1B, ZFC3H1, TCERG1, …	0.0470433	0.241019
GOTERM_BP_ALL	GO:1901576~organic substance biosynthetic process	208	0.000138782	MRPL42, XRCC2, CITED4, UXS1, CUL3, DDX17, CDCA7, AGPS, PPP1R1B, EIF1AX, COL4A3BP, INSIG1, OGT, CCNA2, MUC13, MTERF1, PDPR, GTPBP4, MRPL50, ZNF100, CTDSPL2, MTF2, PRDM6, PIAS1, EIF2AK2, ZNF41, CHKA, SRSF10, SRSF11, HMGCS1, HSPA1B, GPD1L, ARNTL2, POLQ, NR1H4, MAP2K1, SMAD2, ATR, FXR1, METTL14, NUP62, AVPR1A, SUPT16H, RAD54B, IDI1, NAP1L1, BOD1L1, FAR1, FANCM, AGPAT5, ZNF148, ZNF146, ATP5O, HSF4, MY…	0.0483762	0.265702
GOTERM_BP_ALL	GO:0006259~DNA metabolic process	48	0.000150345	SMARCAD1, HMGB1, XRCC2, DICER1, TIPIN, KIAA0101, NAP1L1, TMEM161B, RRM2B, BOD1L1, FANCM, SUMO2, TFAM, SUMO1, POLE2, MDC1, POLG2, TPR, POLQ, NT5E, FEN1, FANCB, HELLS, GNL3, CDK1, ZNF93, GTPBP4, CCDC88A, NASP, GMNN, SMC5, BRIP1, ATAD5, ATR, WRN, HLTF, EEPD1, SMC3, RLF, UBE2N, DNA2, REC8, TEX15, TFRC, SUPT16H, RAD54B, ZRANB3, NFIB	0.0491131	0.287811
GOTERM_BP_ALL	GO:0006913~nucleocytoplasmic transport	28	0.000180473	XPO1, SRSF10, SRSF11, SNRPD1, AKR1C3, NPAP1, CEP57, AGT, SRRM1, TPR, TNPO1, NEMF, KHDRBS1, ABCE1, CDK1, UPF2, HSP90AA1, ANP32E, CTDSPL2, EIF4E, NUP62, RSRC1, NOP58, KPNA3, SNRPF, THOC2, CPSF2, MED1	0.0553083	0.345391
GOTERM_BP_ALL	GO:0006066~alcohol metabolic process	20	0.000268812	CHKA, MOGAT1, MSMO1, SPTLC2, SGPP2, HMGCS1, RDH5, FDFT1, AKR1C3, APOA2, CYP27B1, LRAT, DGAT2, SQLE, P2RY1, APOA5, INSIG1, PCSK9, CAT, IDI1	0.0769224	0.514042
GOTERM_BP_ALL	GO:0006281~DNA repair	30	0.000294374	SMARCAD1, HMGB1, XRCC2, KIAA0101, RRM2B, BOD1L1, FANCM, SUMO2, SUMO1, POLE2, MDC1, POLG2, POLQ, FANCB, FEN1, CDK1, SMC5, BRIP1, ATR, WRN, HLTF, SMC3, EEPD1, UBE2N, DNA2, REC8, TEX15, SUPT16H, RAD54B, ZRANB3	0.0796868	0.562793
GOTERM_BP_ALL	GO:0044237~cellular metabolic process	313	0.000347517	LDHB, FASTKD1, MRPL42, XRCC2, CD2AP, CITED4, UXS1, PRKX, CUL3, PRKY, DDX17, CDCA7, AGPS, PPP1R1B, EIF1AX, COL4A3BP, INSIG1, PTBP3, LSM3, OGT, PTBP2, DDAH1, CCNA2, MUC13, AADAT, PDPR, MTERF1, GTPBP4, MRPL50, ZNF100, MYH3, NAA25, NKTR, EEPD1, CTDSPL2, REC8, MTF2, PRDM6, PIAS1, EIF2AK2, ZNF41, CHKA, SRSF10, TMX3, SRSF11, HMGCS1, HSPA1B, GPD1L, ARNTL2, PPP2R2B, POLQ, NR1H4, PRPF40A, MAP2K1, HBA2, SMA…	0.088928	0.664073
GOTERM_BP_ALL	GO:0006641~triglyceride metabolic process	11	0.000489494	GPD1L, MOGAT1, APOA2, AGPAT5, DGAT2, INSIG1, APOA5, PCSK9, CAT, FABP7, FABP5	0.117454	0.934174
GOTERM_BP_ALL	GO:1901362~organic cyclic compound biosynthetic process	156	0.000513268	XPO1, XRCC2, ZNF823, TBK1, PNP, UXS1, CITED4, KANK2, FDFT1, CUL3, ESF1, DDX17, CDCA7, CASP8AP2, PPP1R1B, INSIG1, APOA5, PSIP1, SRRM1, ZNF443, OGT, CCNA2, GNL3, MTERF1, ZNF100, MYO6, FOXN2, ZNF816, ELL2, CTDSPL2, SUZ12, SLTM, TRIM33, MTF2, PRDM6, DNTTIP2, PIAS1, EIF2AK2, NFE2L3, SNRPF, PRPS2, ZNF41, HMGB1, SRSF10, ONECUT3, DRD5, SRSF11, ONECUT2, HMGCS1, RRM2B, HSPA1B, TCERG1, DDX3X, POLE2, P2RY1, …	0.117556	0.979335
GOTERM_BP_ALL	GO:0051168~nuclear export	15	0.000541602	NEMF, KHDRBS1, ABCE1, XPO1, UPF2, SRSF10, SRSF11, CTDSPL2, NPAP1, EIF4E, NUP62, SRRM1, TPR, THOC2, CPSF2	0.118586	1.03313
GOTERM_BP_ALL	GO:0000398~mRNA splicing, via spliceosome	20	0.000556181	SNRPA1, RBM41, PRPF4B, SRSF10, SRSF11, SNRPD1, SKIV2L2, SNRNP48, METTL14, SRRM4, DDX23, RSRC1, PSIP1, SRRM1, LSM3, PTBP2, SNRPF, CPSF2, HSPA8, PRPF40A	0.116819	1.0608
GOTERM_BP_ALL	GO:0000377~RNA splicing, via transesterification reactions with bulged adenosine as nucleophile	20	0.000556181	SNRPA1, RBM41, PRPF4B, SRSF10, SRSF11, SNRPD1, SKIV2L2, SNRNP48, METTL14, SRRM4, DDX23, RSRC1, PSIP1, SRRM1, LSM3, PTBP2, SNRPF, CPSF2, HSPA8, PRPF40A	0.116819	1.0608
GOTERM_BP_ALL	GO:0006261~DNA-dependent DNA replication	13	0.000603433	FANCM, TFAM, DNA2, POLE2, TIPIN, POLG2, WRN, RRM2B, ZRANB3, POLQ, SMC3, FEN1, BOD1L1	0.12137	1.15043
GOTERM_BP_ALL	GO:0071166~ribonucleoprotein complex localization	12	0.000604013	ABCE1, XPO1, UPF2, EIF4E, NUP62, SRSF10, SRSF11, SRRM1, NOP58, TPR, THOC2, CPSF2	0.117092	1.15153
GOTERM_BP_ALL	GO:0000375~RNA splicing, via transesterification reactions	20	0.000652206	SNRPA1, RBM41, PRPF4B, SRSF10, SRSF11, SNRPD1, SKIV2L2, SNRNP48, METTL14, SRRM4, DDX23, RSRC1, PSIP1, SRRM1, LSM3, PTBP2, SNRPF, CPSF2, HSPA8, PRPF40A	0.121459	1.24286
GOTERM_BP_ALL	GO:0044085~cellular component biogenesis	107	0.000689774	XPO1, XRCC2, SURF6, CAPZA1, SNRPD1, CD2AP, UXS1, CUL3, APOA2, DDX23, AQP11, APOA5, INSIG1, PSIP1, LSM3, PTBP2, GNL2, RC3H1, ASPM, GNL3, GTPBP4, CEP83, OPA1, MYH3, SPIRE1, REC8, CEP162, PIAS1, SNRPF, EIF2AK2, HMGB1, SRSF10, ACTR3B, ONECUT2, CX3CL1, HSPA1B, TUBB, DDX3X, TTBK2, POLQ, HELLS, NR1H4, HBA2, SMAD2, ATR, CRYZ, MYOZ3, EPHA1, PLK4, CORO1A, NUP62, MAP9, UTP20, LIMA1, ATL2, COA4, DICER1, NAP1…	0.123715	1.31401
GOTERM_BP_ALL	GO:0043933~macromolecular complex subunit organization	93	0.000715419	LIMA1, MRPL42, XRCC2, ATL2, COA4, DICER1, CAPZA1, NAP1L1, SNRPD1, UXS1, CD2AP, CUL3, APOA2, DDX23, AQP11, ZNF148, INSIG1, APOA5, PSIP1, LSM3, CAT, PTBP2, OGT, HSF4, TPR, MYB, USP15, RC3H1, ABCE1, CDK1, AR, MRPL50, OPA1, HSP90AA1, KIF5B, ANP32E, SPIRE1, NRXN1, HLTF, THEG, TIMM21, SLIT2, SUZ12, UBE2N, MTF2, PRDM6, USH1C, PIAS1, ATPAF1, EIF2AK2, KPNA3, SNRPF, SMARCAD1, HMGB1, SRSF10, TCAP, ACTR3B, K…	0.12388	1.36255
GOTERM_BP_ALL	GO:0044238~primary metabolic process	312	0.000724792	LDHB, FASTKD1, MRPL42, XRCC2, PGC, CD2AP, CITED4, UXS1, PRKX, CUL3, PRKY, DDX17, CDCA7, AGPS, PPP1R1B, EIF1AX, COL4A3BP, INSIG1, PTBP3, LSM3, OGT, PTBP2, DDAH1, CCNA2, MUC13, AADAT, PDPR, MTERF1, GTPBP4, MRPL50, ZNF100, MYH3, NAA25, NKTR, EEPD1, CTDSPL2, REC8, MTF2, PRDM6, PIAS1, EIF2AK2, ADAMTS4, ZNF41, GC, CHKA, SRSF10, SRSF11, TMX3, HMGCS1, HSPA1B, GPD1L, ARNTL2, POLQ, PPP2R2B, NR1H4, PRPF40A,…	0.121482	1.38028
GOTERM_BP_ALL	GO:0007049~cell cycle	68	0.000749928	XPO1, XRCC2, RPS6KB1, CD2AP, KANK2, CUL3, FANCM, CASP8AP2, TPR, MYB, CCNA2, ASPM, KHDRBS1, CDK1, GTPBP4, HSP90AA1, SPIRE1, STXBP4, ARL3, SASS6, REC8, TUBA4A, USH1C, PIAS1, MED1, SMARCAD1, TIPIN, TXLNG, PHIP, NCAPH, TUBB, CYP27B1, CEP57, DDX3X, POLE2, MDC1, CENPC, PPP2R2B, ZWILCH, DDIAS, FEN1, HELLS, ERCC6L, PRPF40A, TUBB4B, ERH, TRNP1, MAP2K1, GMNN, NASP, SMC5, BRIP1, CENPE, FZD3, ATAD5, ATR, SMC…	0.121632	1.42782
GOTERM_BP_ALL	GO:0007584~response to nutrient	14	0.000810743	ASS1, HMGCS1, BRIP1, RPS6KB1, KANK2, ABCG8, AKR1C3, SLC16A1, CYP27B1, BCHE, LIPG, CAT, OGT, NR1H4	0.127008	1.54276
GOTERM_BP_ALL	GO:1901615~organic hydroxy compound metabolic process	24	0.000861836	GC, CHKA, MOGAT1, MSMO1, SPTLC2, EPAS1, SGPP2, HMGCS1, RDH5, FDFT1, AKR1C3, APOA2, CYP27B1, LRAT, CYP27A1, DGAT2, SQLE, P2RY1, APOA5, INSIG1, PCSK9, CAT, IDI1, MED1	0.130657	1.63922
GOTERM_BP_ALL	GO:0031326~regulation of cellular biosynthetic process	147	0.000937372	XPO1, ZNF823, TBK1, RPS6KB1, CITED4, KANK2, CUL3, ESF1, DDX17, APOA2, CDCA7, CASP8AP2, INSIG1, APOA5, PSIP1, ZNF443, OGT, CCNA2, DDAH1, RC3H1, GNL3, MTERF1, PDPR, GTPBP4, MYO6, ZNF100, FOXN2, ZNF816, ELL2, CTDSPL2, SUZ12, SLTM, TRIM33, MTF2, PRDM6, DNTTIP2, PIAS1, NFE2L3, EIF2AK2, ZNF41, HMGB1, SRSF10, ASS1, ONECUT3, DRD5, ONECUT2, TIPIN, HSPA1B, TCERG1, DDX3X, P2RY1, ARNTL2, NR1H4, HELLS, EPAS1,…	0.13741	1.78167
GOTERM_BP_ALL	GO:0034645~cellular macromolecule biosynthetic process	168	0.000960353	XPO1, MRPL42, XRCC2, ZNF823, TBK1, RPS6KB1, CITED4, KANK2, CUL3, ESF1, DDX17, APOA2, CDCA7, CASP8AP2, PPP1R1B, EIF1AX, INSIG1, ST3GAL6, PSIP1, SRRM1, ZNF443, OGT, CCNA2, RC3H1, MUC13, GNL3, MTERF1, GTPBP4, MRPL50, ZNF100, MYO6, FOXN2, ZNF816, ELL2, CTDSPL2, SUZ12, SLTM, TRIM33, MTF2, PRDM6, DNTTIP2, PIAS1, EIF2AK2, NFE2L3, SNRPF, ZNF41, HMGB1, SRSF10, ONECUT3, SRSF11, ONECUT2, TIPIN, RRM2B, HSPA1…	0.136805	1.82497
GOTERM_BP_ALL	GO:0044271~cellular nitrogen compound biosynthetic process	166	0.00100448	XPO1, MRPL42, XRCC2, ZNF823, TBK1, RPS6KB1, PNP, UXS1, CITED4, KANK2, CUL3, ESF1, DDX17, CDCA7, CASP8AP2, PPP1R1B, EIF1AX, INSIG1, ST3GAL6, PSIP1, SRRM1, ZNF443, OGT, CCNA2, DDAH1, RC3H1, GNL3, MTERF1, MRPL50, ZNF100, MYO6, SPTLC2, FOXN2, ZNF816, ELL2, CTDSPL2, SUZ12, SLTM, TRIM33, MTF2, PRDM6, DNTTIP2, PIAS1, EIF2AK2, NFE2L3, SNRPF, PRPS2, ZNF41, HMGB1, SRSF10, ASS1, ONECUT3, DRD5, SRSF11, ONECU…	0.138951	1.90807
GOTERM_BP_ALL	GO:2000649~regulation of sodium ion transmembrane transporter activity	7	0.00100906	GPD1L, KIF5B, AGT, SLMAP, PCSK9, STK39, GLRX	0.136036	1.91668
GOTERM_BP_ALL	GO:0006396~RNA processing	42	0.00103547	PRPF4B, SRSF10, DICER1, SRSF11, TYW3, SNRPD1, NUFIP1, SKIV2L2, HSPA1B, TRMT10C, ZFC3H1, DDX17, WDR36, SRRM4, DDX23, PSIP1, SRRM1, PTBP3, LSM3, PTBP2, HSPA8, RBM26, PRPF40A, KHDRBS1, SNRPA1, GTPBP4, EXOSC9, RBM41, MAP2K1, SSB, SMAD2, SNRNP48, PPIG, METTL14, RPL22, RSRC1, ZRANB2, NOP58, UTP20, SNRPF, THOC2, CPSF2	0.135932	1.96637
GOTERM_BP_ALL	GO:0022402~cell cycle process	57	0.00107577	XPO1, XRCC2, RPS6KB1, CD2AP, KANK2, CUL3, FANCM, TPR, CCNA2, ASPM, KHDRBS1, CDK1, HSP90AA1, SPIRE1, STXBP4, ARL3, REC8, SASS6, TUBA4A, USH1C, PIAS1, MED1, SMARCAD1, TIPIN, PHIP, TUBB, NCAPH, CYP27B1, CEP57, DDX3X, POLE2, MDC1, CENPC, DDIAS, ZWILCH, FEN1, HELLS, PRPF40A, TUBB4B, ERCC6L, MAP2K1, SMC5, BRIP1, ATAD5, CENPE, ATR, SMC2, CENPJ, SMC3, DNA2, ATF5, PLK4, EIF4E, TEX15, NUP62, RAD54B, MAP9	0.137483	2.04216
GOTERM_BP_ALL	GO:0006397~mRNA processing	26	0.00115605	PRPF4B, SRSF10, SRSF11, SNRPD1, SKIV2L2, HSPA1B, SRRM4, DDX23, PSIP1, SRRM1, LSM3, PTBP3, PTBP2, HSPA8, PRPF40A, RBM26, KHDRBS1, SNRPA1, RBM41, SNRNP48, METTL14, RSRC1, ZRANB2, SNRPF, THOC2, CPSF2	0.14356	2.19296
GOTERM_BP_ALL	GO:0009889~regulation of biosynthetic process	148	0.00115689	XPO1, ZNF823, TBK1, RPS6KB1, CITED4, KANK2, CUL3, ESF1, DDX17, APOA2, CDCA7, CASP8AP2, INSIG1, APOA5, PSIP1, ZNF443, OGT, CCNA2, DDAH1, RC3H1, GNL3, MTERF1, PDPR, GTPBP4, MYO6, ZNF100, FOXN2, ZNF816, ELL2, CTDSPL2, SUZ12, SLTM, TRIM33, MTF2, PRDM6, DNTTIP2, PIAS1, EIF2AK2, NFE2L3, ZNF41, HMGB1, SRSF10, ASS1, ONECUT3, DRD5, ONECUT2, TIPIN, HSPA1B, TCERG1, DDX3X, P2RY1, ARNTL2, NR1H4, HELLS, EPAS1,…	0.140412	2.19455
GOTERM_BP_ALL	GO:0051236~establishment of RNA localization	14	0.00123507	KHDRBS1, XPO1, UPF2, SRSF10, SRSF11, ATR, ATXN2, NPAP1, EIF4E, NUP62, SRRM1, TPR, THOC2, CPSF2	0.145883	2.3412
GOTERM_BP_ALL	GO:0065003~macromolecular complex assembly	68	0.00134482	XRCC2, ATL2, COA4, DICER1, CAPZA1, NAP1L1, SNRPD1, UXS1, CD2AP, CUL3, APOA2, DDX23, ZNF148, AQP11, APOA5, INSIG1, PSIP1, LSM3, CAT, HSF4, PTBP2, TPR, RC3H1, CDK1, AR, OPA1, HSP90AA1, ANP32E, SPIRE1, NRXN1, THEG, TIMM21, SLIT2, USH1C, PIAS1, EIF2AK2, KPNA3, SNRPF, ATPAF1, SMARCAD1, HMGB1, SRSF10, TCAP, ACTR3B, NUFIP1, PPP6R3, CX3CL1, PATL1, TFAM, SUMO1, CEP57, DDX3X, CENPC, POLQ, TNPO1, HELLS, GMN…	0.154405	2.54669
GOTERM_BP_ALL	GO:0071426~ribonucleoprotein complex export from nucleus	11	0.00141134	ABCE1, XPO1, UPF2, EIF4E, NUP62, SRSF10, SRSF11, SRRM1, TPR, THOC2, CPSF2	0.158035	2.67106
GOTERM_BP_ALL	GO:0006639~acylglycerol metabolic process	11	0.00141134	GPD1L, MOGAT1, APOA2, AGPAT5, DGAT2, INSIG1, APOA5, PCSK9, CAT, FABP7, FABP5	0.158035	2.67106
GOTERM_BP_ALL	GO:0006312~mitotic recombination	7	0.00144779	DNA2, XRCC2, POLE2, SMC5, RAD54B, WRN, FEN1	0.158476	2.73913
GOTERM_BP_ALL	GO:0071704~organic substance metabolic process	322	0.0014605	LDHB, FASTKD1, MRPL42, XRCC2, PGC, CD2AP, CITED4, UXS1, PRKX, CUL3, PRKY, DDX17, CDCA7, AGPS, PPP1R1B, EIF1AX, COL4A3BP, INSIG1, PTBP3, LSM3, OGT, PTBP2, DDAH1, CCNA2, MUC13, AADAT, PDPR, MTERF1, GTPBP4, MRPL50, ZNF100, MYH3, NAA25, NKTR, EEPD1, CTDSPL2, REC8, MTF2, PRDM6, PIAS1, EIF2AK2, ADAMTS4, ZNF41, GC, CHKA, SRSF10, SRSF11, TMX3, HMGCS1, HSPA1B, GPD1L, ARNTL2, POLQ, PPP2R2B, NR1H4, PRPF40A,…	0.156565	2.76287
GOTERM_BP_ALL	GO:0008202~steroid metabolic process	18	0.00149777	GC, MSMO1, HMGCS1, FDFT1, AKR1C3, APOA2, AKR1C4, CYP27B1, DGAT2, CYP27A1, SQLE, AGT, APOA5, INSIG1, PCSK9, CAT, IDI1, NR1H4	0.157099	2.83241
GOTERM_BP_ALL	GO:0022613~ribonucleoprotein complex biogenesis	26	0.00150005	XPO1, SRSF10, SURF6, DICER1, SNRPD1, NUFIP1, SKIV2L2, PATL1, WDR36, DDX3X, DDX23, PSIP1, LSM3, PTBP2, GNL2, RC3H1, GNL3, ABCE1, GTPBP4, EXOSC9, ATR, ATXN2, RPL22, NOP58, SNRPF, UTP20	0.154308	2.83667
GOTERM_BP_ALL	GO:0006638~neutral lipid metabolic process	11	0.0015044	GPD1L, MOGAT1, APOA2, AGPAT5, DGAT2, INSIG1, APOA5, PCSK9, CAT, FABP7, FABP5	0.151815	2.84478
GOTERM_BP_ALL	GO:0006996~organelle organization	130	0.0015469	XPO1, MRPL42, XRCC2, SYT4, CAPZA1, CD2AP, KLHL1, HOOK1, CUL3, SLC16A1, AQP11, COL4A3BP, INSIG1, LSM3, OGT, CCNA2, RC3H1, ASPM, GNL3, MTERF1, MRPL50, CEP83, OPA1, KIF5B, MYH3, SPIRE1, SUZ12, REC8, CEP162, MTF2, PRDM6, TUBA4A, HMGB1, ACTR3B, ONECUT2, TIPIN, RRM2B, HSPA1B, BLOC1S6, TUBB, DDX3X, POLE2, TTBK2, NR1H4, HELLS, ERCC6L, PRPF40A, TUBB4B, EPAS1, MAP2K1, TAF5, CROCCP3, BRIP1, WRN, ATR, MYOZ3,…	0.152891	2.92403
GOTERM_BP_ALL	GO:0071840~cellular component organization or biogenesis	202	0.00156258	MRPL42, XRCC2, SYT4, SURF6, UXS1, CD2AP, SSR1, CUL3, HOOK1, AQP11, COL4A3BP, INSIG1, LSM3, PTBP2, OGT, CCNA2, MTERF1, GTPBP4, MRPL50, OPA1, KIF5B, MYH3, SPIRE1, REC8, CEP162, MTF2, PRDM6, TUBA4A, PIAS1, EIF2AK2, ADAMTS4, SRSF10, HSPA1B, AHNAK2, POLQ, NR1H4, TUBB4B, PRPF40A, MAP2K1, CROCCP3, SMAD2, HBA2, ATR, MYOZ3, CRYZ, EPHA1, COL14A1, NUP62, AVPR1A, SUPT16H, RAD54B, MAP9, UTP20, LIMA1, TIMM17A,…	0.151531	2.95325
GOTERM_BP_ALL	GO:0032392~DNA geometric change	9	0.00158031	MTERF1, HMGB1, DNA2, DDX3X, G3BP1, BRIP1, RAD54B, WRN, ZRANB3	0.150402	2.98628
GOTERM_BP_ALL	GO:0009059~macromolecule biosynthetic process	171	0.00166374	XPO1, MRPL42, XRCC2, ZNF823, TBK1, RPS6KB1, CITED4, KANK2, CUL3, ESF1, DDX17, APOA2, CDCA7, CASP8AP2, PPP1R1B, EIF1AX, INSIG1, ST3GAL6, PSIP1, SRRM1, ZNF443, OGT, CCNA2, RC3H1, MUC13, GNL3, MTERF1, GTPBP4, MRPL50, ZNF100, MYO6, FOXN2, ZNF816, ELL2, CTDSPL2, SUZ12, SLTM, TRIM33, MTF2, PRDM6, DNTTIP2, PIAS1, EIF2AK2, NFE2L3, SNRPF, ZNF41, HMGB1, SRSF10, ONECUT3, SRSF11, ONECUT2, TIPIN, RRM2B, HSPA1…	0.154956	3.14156
GOTERM_BP_ALL	GO:1902652~secondary alcohol metabolic process	11	0.00170547	APOA2, MSMO1, CYP27B1, SQLE, INSIG1, APOA5, HMGCS1, PCSK9, CAT, IDI1, FDFT1	0.155826	3.21913
GOTERM_BP_ALL	GO:0014070~response to organic cyclic compound	41	0.00173459	CHKA, HMGB1, ASS1, GABRB2, DRD5, DICER1, HMGCS1, OXTR, RPS6KB1, KANK2, AKR1C3, SLC16A1, APOA2, DDX17, CYP27B1, BCHE, SAFB, P2RY1, DNAJA1, CAT, CCNA2, NR1H4, IHH, CDK1, AR, HSP90AA1, TRPC3, SOCS2, MAP2K1, GNRH1, NASP, SMAD2, SLIT2, GJB2, EIF4E, CATSPER2, SP5, AVPR1A, LRP8, PIAS1, MED1	0.155625	3.27323
GOTERM_BP_ALL	GO:0006695~cholesterol biosynthetic process	7	0.00181226	MSMO1, SQLE, INSIG1, APOA5, HMGCS1, IDI1, FDFT1	0.159354	3.4174
GOTERM_BP_ALL	GO:0006403~RNA localization	15	0.0019263	KHDRBS1, XPO1, UPF2, SRSF10, SRSF11, ATR, ATXN2, NPAP1, EIF4E, NUP62, SRRM1, NOP58, TPR, THOC2, CPSF2	0.165799	3.62871
GOTERM_BP_ALL	GO:0015931~nucleobase-containing compound transport	15	0.0019263	KHDRBS1, XPO1, UPF2, SRSF10, SRSF11, GJB1, ATXN2, NPAP1, EIF4E, NUP62, SLC35B4, SRRM1, TPR, THOC2, CPSF2	0.165799	3.62871
GOTERM_BP_ALL	GO:0006405~RNA export from nucleus	11	0.00192775	KHDRBS1, NPAP1, UPF2, EIF4E, NUP62, SRSF10, SRSF11, SRRM1, TPR, THOC2, CPSF2	0.1633	3.6314
GOTERM_BP_ALL	GO:0046165~alcohol biosynthetic process	10	0.00195391	MSMO1, CYP27B1, SPTLC2, SQLE, INSIG1, P2RY1, APOA5, HMGCS1, IDI1, FDFT1	0.162763	3.6798
GOTERM_BP_ALL	GO:1902653~secondary alcohol biosynthetic process	7	0.00201865	MSMO1, SQLE, INSIG1, APOA5, HMGCS1, IDI1, FDFT1	0.165132	3.7995
GOTERM_BP_ALL	GO:0071103~DNA conformation change	18	0.00202404	HMGB1, MTERF1, CDK1, NASP, ANP32E, G3BP1, NAP1L1, BRIP1, WRN, SMC2, DNA2, NCAPH, DDX3X, CENPC, RAD54B, ZRANB3, TPR, HELLS	0.163055	3.80945
GOTERM_BP_ALL	GO:0008156~negative regulation of DNA replication	6	0.00209816	GTPBP4, GMNN, TIPIN, ATR, ZRANB3, SMC3	0.16602	3.94631
GOTERM_BP_ALL	GO:0033554~cellular response to stress	69	0.00211284	XRCC2, PRDX3, SSR1, BOD1L1, AKR1C3, FANCM, COL4A3BP, APOA5, INSIG1, STK39, POLG2, YOD1, TPR, CCNA2, FANCB, CHUK, CDK1, RAP2A, OPA1, MYO6, HSP90AA1, MINK1, STXBP4, HLTF, EEPD1, UBE2N, REC8, EIF2AK2, SMARCAD1, HMGB1, TMX1, ASS1, TMX3, TIPIN, KIAA0101, RRM2B, HSPA1B, SUMO2, DAPL1, SUMO1, DDX3X, POLE2, MDC1, AGT, DNAJA1, PCSK9, POLQ, FEN1, HSPA8, EPAS1, MAP2K1, SMC5, BRIP1, ATAD5, WRN, ATR, CENPJ, SM…	0.16466	3.9734
GOTERM_BP_ALL	GO:0006694~steroid biosynthetic process	12	0.0021484	AKR1C3, MSMO1, AKR1C4, CYP27B1, CYP27A1, SQLE, INSIG1, APOA5, HMGCS1, IDI1, NR1H4, FDFT1	0.164803	4.03897
GOTERM_BP_ALL	GO:0006310~DNA recombination	17	0.00222353	HMGB1, XRCC2, SMC5, BRIP1, ATAD5, WRN, UBE2N, FANCM, DNA2, REC8, TEX15, TFRC, POLE2, RAD54B, ZRANB3, POLQ, FEN1	0.16767	4.17738
GOTERM_BP_ALL	GO:0006974~cellular response to DNA damage stimulus	37	0.0024756	SMARCAD1, HMGB1, XRCC2, TIPIN, KIAA0101, RRM2B, BOD1L1, FANCM, SUMO2, SUMO1, POLE2, MDC1, DNAJA1, POLG2, POLQ, CCNA2, FANCB, FEN1, CDK1, MYO6, SMC5, BRIP1, ATAD5, STXBP4, ATR, WRN, HLTF, CENPJ, SMC3, EEPD1, UBE2N, DNA2, REC8, TEX15, SUPT16H, RAD54B, ZRANB3	0.182301	4.64037
GOTERM_BP_ALL	GO:0016043~cellular component organization	196	0.00257419	MRPL42, XRCC2, SYT4, UXS1, CD2AP, SSR1, CUL3, HOOK1, AQP11, COL4A3BP, INSIG1, LSM3, PTBP2, OGT, CCNA2, MTERF1, OPA1, MRPL50, KIF5B, MYH3, SPIRE1, REC8, CEP162, MTF2, PRDM6, TUBA4A, PIAS1, EIF2AK2, ADAMTS4, SRSF10, HSPA1B, AHNAK2, POLQ, NR1H4, TUBB4B, PRPF40A, MAP2K1, CROCCP3, SMAD2, HBA2, ATR, CRYZ, MYOZ3, EPHA1, COL14A1, NUP62, AVPR1A, SUPT16H, RAD54B, MAP9, LIMA1, TIMM17A, NAP1L1, TRMT10C, FANC…	0.186299	4.82087
GOTERM_BP_ALL	GO:0015850~organic hydroxy compound transport	14	0.00266694	ABCG8, APOA2, AKR1C4, SYT4, AQP11, AGT, P2RY1, APOA5, LIPG, ABCC3, SLC22A3, OXTR, SLC51A, NR1H4	0.189788	4.99038
GOTERM_BP_ALL	GO:0034654~nucleobase-containing compound biosynthetic process	146	0.0026802	XPO1, XRCC2, ZNF823, TBK1, PNP, UXS1, CITED4, KANK2, CUL3, ESF1, DDX17, CDCA7, CASP8AP2, PPP1R1B, INSIG1, PSIP1, SRRM1, ZNF443, OGT, CCNA2, GNL3, MTERF1, ZNF100, MYO6, FOXN2, ZNF816, ELL2, CTDSPL2, SUZ12, SLTM, TRIM33, MTF2, PRDM6, DNTTIP2, PIAS1, EIF2AK2, SNRPF, NFE2L3, PRPS2, ZNF41, HMGB1, SRSF10, ONECUT3, DRD5, SRSF11, ONECUT2, RRM2B, HSPA1B, TCERG1, DDX3X, POLE2, P2RY1, ARNTL2, POLQ, NR1H4, H…	0.188152	5.01461
GOTERM_BP_ALL	GO:0016125~sterol metabolic process	11	0.00273823	APOA2, MSMO1, CYP27A1, SQLE, INSIG1, APOA5, HMGCS1, PCSK9, CAT, IDI1, FDFT1	0.18935	5.12049
GOTERM_BP_ALL	GO:0051173~positive regulation of nitrogen compound metabolic process	68	0.00299315	GPBP1, TBK1, RPS6KB1, CITED4, EPCAM, DDX17, ZNF148, INSIG1, PSIP1, HSF4, OGT, MYB, DDAH1, CCNA2, RC3H1, CHUK, GNL3, IHH, KHDRBS1, CDK1, AR, EXOSC9, MYO6, HSP90AA1, NOS1AP, FOXN2, HLTF, DDN, UBE2N, MTF2, PIAS1, NFE2L3, MED1, SMARCAD1, HMGB1, ASS1, DRD5, ONECUT3, NANOS1, ONECUT2, NUFIP1, PAXBP1, HSPA1B, PHIP, SUMO2, TFAM, DDX3X, SAFB, AGT, P2RY1, CEBPZ, NFAT5, ARNTL2, NR1H4, HSPA8, EPAS1, MAP2K1, S…	0.202488	5.58433
GOTERM_BP_ALL	GO:0051171~regulation of nitrogen compound metabolic process	147	0.00300537	XPO1, ZNF823, TBK1, RPS6KB1, CITED4, KANK2, CUL3, ESF1, DDX17, CDCA7, CASP8AP2, SRRM4, INSIG1, PSIP1, ZNF443, PTBP3, PTBP2, OGT, CCNA2, DDAH1, RC3H1, GNL3, MTERF1, GTPBP4, MYO6, ZNF100, FOXN2, ZNF816, ELL2, CTDSPL2, SUZ12, SLTM, TRIM33, MTF2, PRDM6, DNTTIP2, PIAS1, NFE2L3, EIF2AK2, ZNF41, HMGB1, SRSF10, ASS1, ONECUT3, DRD5, ONECUT2, TIPIN, HSPA1B, TCERG1, DDX3X, P2RY1, ARNTL2, POLQ, NR1H4, HELLS,…	0.200707	5.60652
GOTERM_BP_ALL	GO:1902305~regulation of sodium ion transmembrane transport	7	0.00302599	GPD1L, KIF5B, AGT, SLMAP, PCSK9, STK39, GLRX	0.199467	5.64394
GOTERM_BP_ALL	GO:0000278~mitotic cell cycle	42	0.00316038	XRCC2, TIPIN, RPS6KB1, CD2AP, KANK2, CUL3, PHIP, TUBB, NCAPH, CEP57, POLE2, DDX3X, MDC1, CENPC, TPR, MYB, ZWILCH, PPP2R2B, CCNA2, HELLS, ASPM, ERCC6L, TUBB4B, KHDRBS1, CDK1, HSP90AA1, SMC5, CENPE, ATAD5, FZD3, CENPJ, SMC2, SMC3, DNA2, REC8, PLK4, EIF4E, NUP62, TUBA4A, USH1C, PIAS1, MAP9	0.204857	5.88744
GOTERM_BP_ALL	GO:0050657~nucleic acid transport	13	0.00316936	KHDRBS1, XPO1, UPF2, SRSF10, SRSF11, ATXN2, NPAP1, EIF4E, NUP62, SRRM1, TPR, THOC2, CPSF2	0.202937	5.90371
GOTERM_BP_ALL	GO:0050658~RNA transport	13	0.00316936	KHDRBS1, XPO1, UPF2, SRSF10, SRSF11, ATXN2, NPAP1, EIF4E, NUP62, SRRM1, TPR, THOC2, CPSF2	0.202937	5.90371
GOTERM_BP_ALL	GO:0071826~ribonucleoprotein complex subunit organization	15	0.00319932	SRSF10, KIF5B, DICER1, SNRPD1, NUFIP1, ATR, PATL1, ATXN2, DDX3X, DDX23, PSIP1, LSM3, PTBP2, SNRPF, RC3H1	0.202247	5.95791
GOTERM_BP_ALL	GO:0019219~regulation of nucleobase-containing compound metabolic process	138	0.00331236	XPO1, ZNF823, TBK1, CITED4, KANK2, CUL3, ESF1, DDX17, CDCA7, CASP8AP2, SRRM4, INSIG1, PSIP1, ZNF443, PTBP3, PTBP2, OGT, CCNA2, RC3H1, GNL3, MTERF1, GTPBP4, MYO6, ZNF100, FOXN2, ZNF816, ELL2, CTDSPL2, SUZ12, SLTM, TRIM33, MTF2, PRDM6, DNTTIP2, PIAS1, NFE2L3, EIF2AK2, ZNF41, HMGB1, SRSF10, ONECUT3, DRD5, ONECUT2, TIPIN, HSPA1B, TCERG1, DDX3X, P2RY1, ARNTL2, POLQ, NR1H4, HELLS, EPAS1, MAP2K1, TAF5, …	0.206193	6.16213
GOTERM_BP_ALL	GO:0022607~cellular component assembly	94	0.00332139	LIMA1, XRCC2, ATL2, COA4, DICER1, CAPZA1, NAP1L1, SNRPD1, UXS1, CD2AP, CUL3, APOA2, DDX23, AQP11, ZNF148, INSIG1, APOA5, PSIP1, LSM3, CAT, PTBP2, HSF4, TPR, RC3H1, ASPM, CDK1, RAP2A, AR, OPA1, HSP90AA1, CCDC88A, CEP83, MYH3, ANP32E, MINK1, SPIRE1, NRXN1, THEG, TIMM21, SLIT2, SASS6, REC8, CEP162, USH1C, PIAS1, ATPAF1, EIF2AK2, KPNA3, SNRPF, SMARCAD1, HMGB1, SRSF10, TCAP, ACTR3B, ONECUT2, OXTR, NUF…	0.204334	6.17842
GOTERM_BP_ALL	GO:0016126~sterol biosynthetic process	7	0.00332783	MSMO1, SQLE, INSIG1, APOA5, HMGCS1, IDI1, FDFT1	0.202379	6.19005
GOTERM_BP_ALL	GO:0016925~protein sumoylation	11	0.00341555	SUMO2, SUMO1, NUP62, MDC1, SMC5, NOP58, PIAS1, WRN, TPR, SMC3, GNL3	0.204823	6.34819
GOTERM_BP_ALL	GO:0051276~chromosome organization	49	0.00345482	XPO1, NAP1L1, CUL3, OGT, HSF4, TPR, MYB, USP15, GNL3, MTERF1, CDK1, G3BP1, ANP32E, HLTF, UBE2N, SUZ12, REC8, MTF2, PRDM6, SMARCAD1, HMGB1, KMT2C, PAXBP1, NCAPH, DDX3X, POLE2, CEP57, SAFB, CENPC, ZWILCH, FEN1, NR1H4, HELLS, ERCC6L, TAF5, NASP, SMC5, BRIP1, CENPE, ATR, WRN, SMC2, SMC3, RLF, DNA2, TEX15, SUPT16H, RAD54B, ZRANB3	0.204646	6.4189
GOTERM_BP_ALL	GO:0031667~response to nutrient levels	22	0.00353955	ASS1, HMGCS1, BRIP1, RPS6KB1, WRN, KANK2, ACVR1C, AKR1C3, ABCG8, DAPL1, SLC16A1, CYP27B1, BCHE, LIPG, SLC22A3, PCSK9, CAT, OGT, EIF2AK2, NR1H4, HSPA8, MED1	0.206842	6.57131
GOTERM_BP_ALL	GO:0048545~response to steroid hormone	21	0.00390571	HMGB1, AR, GNRH1, ASS1, OXTR, RPS6KB1, SLIT2, KANK2, GJB2, AKR1C3, DDX17, APOA2, EIF4E, CATSPER2, BCHE, SAFB, AVPR1A, DNAJA1, PIAS1, NR1H4, MED1	0.223276	7.22723
GOTERM_BP_ALL	GO:0009991~response to extracellular stimulus	23	0.00396303	ASS1, HMGCS1, BRIP1, RPS6KB1, WRN, KANK2, ACVR1C, AKR1C3, ABCG8, DAPL1, SLC16A1, CYP27B1, BCHE, LIPG, AVPR1A, SLC22A3, PCSK9, CAT, OGT, EIF2AK2, NR1H4, HSPA8, MED1	0.223791	7.32951
GOTERM_BP_ALL	GO:0097006~regulation of plasma lipoprotein particle levels	7	0.00399802	APOA2, DGAT2, AGT, APOA5, LIPG, PCSK9, NR1H4	0.223197	7.3919
GOTERM_BP_ALL	GO:0008203~cholesterol metabolic process	10	0.00412189	APOA2, MSMO1, SQLE, INSIG1, APOA5, HMGCS1, PCSK9, CAT, IDI1, FDFT1	0.226927	7.61244
GOTERM_BP_ALL	GO:0006302~double-strand break repair	14	0.00422841	SMARCAD1, XRCC2, SMC5, BRIP1, WRN, UBE2N, DNA2, SUMO1, REC8, TEX15, MDC1, RAD54B, POLQ, FEN1	0.229729	7.80168
GOTERM_BP_ALL	GO:0018130~heterocycle biosynthetic process	146	0.00436606	XPO1, XRCC2, ZNF823, TBK1, PNP, UXS1, CITED4, KANK2, CUL3, ESF1, DDX17, CDCA7, CASP8AP2, PPP1R1B, INSIG1, PSIP1, SRRM1, ZNF443, OGT, CCNA2, GNL3, MTERF1, ZNF100, MYO6, FOXN2, ZNF816, ELL2, CTDSPL2, SUZ12, SLTM, TRIM33, MTF2, PRDM6, DNTTIP2, PIAS1, EIF2AK2, SNRPF, NFE2L3, PRPS2, ZNF41, HMGB1, SRSF10, ONECUT3, DRD5, SRSF11, ONECUT2, RRM2B, HSPA1B, TCERG1, DDX3X, POLE2, P2RY1, ARNTL2, POLQ, NR1H4, H…	0.233917	8.04569
GOTERM_BP_ALL	GO:0019218~regulation of steroid metabolic process	8	0.00453322	AKR1C3, APOA2, CYP27B1, DGAT2, AGT, INSIG1, APOA5, NR1H4	0.23935	8.34119
GOTERM_BP_ALL	GO:0007059~chromosome segregation	19	0.00465819	SMARCAD1, XPO1, SMC5, CENPE, SMC2, SMC3, CUL3, FANCM, REC8, NCAPH, TEX15, DDX3X, CEP57, CENPC, DDX3Y, TPR, ZWILCH, FEN1, ERCC6L	0.242716	8.56151
GOTERM_BP_ALL	GO:0000060~protein import into nucleus, translocation	6	0.0048387	AKR1C3, CDK1, HSP90AA1, CEP57, TNPO1, MED1	0.248469	8.87888
GOTERM_BP_ALL	GO:0019438~aromatic compound biosynthetic process	146	0.00489071	XPO1, XRCC2, ZNF823, TBK1, PNP, UXS1, CITED4, KANK2, CUL3, ESF1, DDX17, CDCA7, CASP8AP2, PPP1R1B, INSIG1, PSIP1, SRRM1, ZNF443, OGT, CCNA2, GNL3, MTERF1, ZNF100, MYO6, FOXN2, ZNF816, ELL2, CTDSPL2, SUZ12, SLTM, TRIM33, MTF2, PRDM6, DNTTIP2, PIAS1, EIF2AK2, SNRPF, NFE2L3, PRPS2, ZNF41, HMGB1, SRSF10, ONECUT3, DRD5, SRSF11, ONECUT2, RRM2B, HSPA1B, TCERG1, DDX3X, POLE2, P2RY1, ARNTL2, POLQ, NR1H4, H…	0.248424	8.97013
GOTERM_BP_ALL	GO:0042592~homeostatic process	63	0.00493438	PRDX3, STXBP5L, SLC16A1, APOA2, WDR36, AQP11, COL4A3BP, APOA5, STK39, PTBP3, OGT, SLC4A4, JPH1, RC3H1, MUC13, HTR1F, GNL3, KIF5B, STXBP4, NRXN1, PIGR, DGAT2, GTF2I, USH1C, MED1, HMGB1, TMX1, SLC39A10, DRD5, NANOS1, TMX3, OXTR, NMB, KIT, CDH2, GPD1L, CYP27B1, POLE2, AGT, P2RY1, PCSK9, SLC4A7, FEN1, NR1H4, GLRX, TRPC3, EPAS1, SLC12A2, SMC5, WRN, ATR, ATP13A3, ABCG8, SCGN, DNA2, ERP44, CORO1A, TEX15…	0.248016	9.04667
GOTERM_BP_ALL	GO:0022618~ribonucleoprotein complex assembly	14	0.00537078	SRSF10, DICER1, SNRPD1, NUFIP1, ATR, PATL1, ATXN2, DDX3X, DDX23, PSIP1, LSM3, PTBP2, SNRPF, RC3H1	0.264362	9.80827
GOTERM_BP_ALL	GO:0044260~cellular macromolecule metabolic process	256	0.0055129	FASTKD1, MRPL42, XRCC2, CITED4, CD2AP, PRKX, PRKY, CUL3, DDX17, CDCA7, PPP1R1B, EIF1AX, COL4A3BP, INSIG1, LSM3, PTBP3, PTBP2, OGT, CCNA2, MUC13, MTERF1, GTPBP4, MRPL50, ZNF100, MYH3, NAA25, NKTR, EEPD1, CTDSPL2, REC8, MTF2, PRDM6, PIAS1, EIF2AK2, ZNF41, SRSF10, TMX3, SRSF11, HSPA1B, GPD1L, ARNTL2, PPP2R2B, POLQ, NR1H4, PRPF40A, MAP2K1, SMAD2, ATR, EPHA1, FXR1, METTL14, NUP62, DCP1A, SUPT16H, RAD5…	0.267906	10.055
GOTERM_BP_ALL	GO:2000112~regulation of cellular macromolecule biosynthetic process	133	0.00566591	XPO1, ZNF823, TBK1, RPS6KB1, CITED4, KANK2, CUL3, ESF1, DDX17, CDCA7, CASP8AP2, INSIG1, PSIP1, ZNF443, OGT, CCNA2, RC3H1, GNL3, MTERF1, GTPBP4, MYO6, ZNF100, FOXN2, ZNF816, ELL2, CTDSPL2, SUZ12, SLTM, TRIM33, MTF2, PRDM6, DNTTIP2, PIAS1, NFE2L3, EIF2AK2, ZNF41, HMGB1, SRSF10, ONECUT3, ONECUT2, TIPIN, HSPA1B, TCERG1, DDX3X, P2RY1, ARNTL2, NR1H4, HELLS, EPAS1, MAP2K1, TAF5, BRIP1, SMAD2, ATR, FXR1,…	0.271806	10.3199
GOTERM_BP_ALL	GO:0051051~negative regulation of transport	23	0.00590377	TNFRSF21, HMGB1, SYT4, SPINK1, OXTR, NMB, HSPA1B, ACVR1C, STXBP5L, ABCG8, ATXN2, SUMO1, CORO1A, APOA2, AGT, P2RY1, INSIG1, TBC1D4, PCSK9, STK39, YOD1, TPR, NR1H4	0.279013	10.7303
GOTERM_BP_ALL	GO:0034622~cellular macromolecular complex assembly	42	0.00598142	HMGB1, XRCC2, TCAP, SRSF10, COA4, ACTR3B, DICER1, CAPZA1, SNRPD1, NAP1L1, NUFIP1, PATL1, TFAM, DDX23, DDX3X, CENPC, INSIG1, PSIP1, LSM3, PTBP2, TPR, TNPO1, RC3H1, HELLS, HSP90AA1, OPA1, NASP, ANP32E, CENPE, SPIRE1, SMAD2, ATR, CENPJ, THEG, SLIT2, TIMM21, ATXN2, CORO1A, USH1C, PIAS1, ATPAF1, SNRPF	0.279686	10.8638
GOTERM_BP_ALL	GO:0008152~metabolic process	327	0.00605171	LDHB, FASTKD1, MRPL42, XRCC2, PGC, CD2AP, CITED4, UXS1, PRKX, CUL3, PRKY, DDX17, CDCA7, AGPS, PPP1R1B, EIF1AX, COL4A3BP, INSIG1, PTBP3, LSM3, OGT, PTBP2, DDAH1, CCNA2, MUC13, AADAT, PDPR, MTERF1, GTPBP4, MRPL50, ZNF100, MYH3, NAA25, NKTR, EEPD1, CTDSPL2, REC8, MTF2, PRDM6, PIAS1, EIF2AK2, ADAMTS4, ZNF41, GC, CHKA, TMX1, SRSF10, SRSF11, TMX3, HMGCS1, HSPA1B, GPD1L, ARNTL2, POLQ, PPP2R2B, NR1H4, PR…	0.280056	10.9846
GOTERM_BP_ALL	GO:0031328~positive regulation of cellular biosynthetic process	65	0.00638181	GPBP1, TBK1, RPS6KB1, CITED4, EPCAM, DDX17, APOA2, ZNF148, APOA5, INSIG1, PSIP1, HSF4, OGT, MYB, DDAH1, CCNA2, CHUK, GNL3, IHH, KHDRBS1, CDK1, AR, EXOSC9, MYO6, HSP90AA1, NOS1AP, FOXN2, HLTF, DDN, DGAT2, MTF2, PIAS1, NFE2L3, MED1, SMARCAD1, HMGB1, ASS1, DRD5, ONECUT3, ONECUT2, NUFIP1, PAXBP1, PHIP, SUMO2, TFAM, DDX3X, SAFB, AGT, P2RY1, CEBPZ, NFAT5, ARNTL2, NR1H4, EPAS1, MAP2K1, SMAD2, ATR, RLF, …	0.290431	11.5496
GOTERM_BP_ALL	GO:0014075~response to amine	6	0.00656266	CDK1, ASS1, PPP1R1B, DRD5, OXTR, RRM2B	0.29486	11.8577
GOTERM_BP_ALL	GO:0033993~response to lipid	37	0.0066398	HMGB1, TNFRSF21, ASS1, GDAP1, HMGCS1, OXTR, RPS6KB1, PRDX3, KANK2, AKR1C3, APOA2, DDX17, CYP27B1, BCHE, SAFB, DNAJA1, CAT, OGT, CCNA2, CHUK, NR1H4, IHH, AR, SOCS2, GNRH1, NASP, SMAD2, SLIT2, GJB2, RPS6KA3, EIF4E, CATSPER2, DGAT2, AVPR1A, LRP8, PIAS1, MED1	0.295321	11.9888
GOTERM_BP_ALL	GO:0051254~positive regulation of RNA metabolic process	55	0.00672898	GPBP1, TBK1, CITED4, EPCAM, DDX17, ZNF148, INSIG1, PSIP1, HSF4, OGT, MYB, CCNA2, RC3H1, CHUK, IHH, GNL3, AR, EXOSC9, MYO6, FOXN2, HLTF, DDN, MTF2, PIAS1, NFE2L3, MED1, SMARCAD1, HMGB1, ONECUT3, NANOS1, ONECUT2, NUFIP1, PAXBP1, HSPA1B, PHIP, SUMO2, TFAM, DDX3X, SAFB, AGT, P2RY1, NFAT5, CEBPZ, ARNTL2, HSPA8, NR1H4, EPAS1, MAP2K1, SMAD2, RLF, ATF5, RPS6KA3, NUP62, SUPT16H, NFIB	0.296218	12.1401
GOTERM_BP_ALL	GO:0017148~negative regulation of translation	11	0.00688964	EIF4E, METTL14, DDX3X, MAP2K1, DICER1, NANOS1, SMAD2, EIF2AK2, TPR, RC3H1, FXR1	0.299698	12.4121
GOTERM_BP_ALL	GO:0031339~negative regulation of vesicle fusion	3	0.00696868	CORO1A, SYT4, TBC1D4	0.300167	12.5457
GOTERM_BP_ALL	GO:0001992~regulation of systemic arterial blood pressure by vasopressin	3	0.00696868	DRD5, AVPR1A, OXTR	0.300167	12.5457
GOTERM_BP_ALL	GO:0006406~mRNA export from nucleus	9	0.00739154	UPF2, EIF4E, NUP62, SRSF10, SRSF11, SRRM1, TPR, THOC2, CPSF2	0.312765	13.2568
GOTERM_BP_ALL	GO:0071427~mRNA-containing ribonucleoprotein complex export from nucleus	9	0.00739154	UPF2, EIF4E, NUP62, SRSF10, SRSF11, SRRM1, TPR, THOC2, CPSF2	0.312765	13.2568
GOTERM_BP_ALL	GO:2001252~positive regulation of chromosome organization	11	0.00755344	UBE2N, CUL3, MTF2, SMC5, PAXBP1, OGT, ATR, TPR, MYB, FEN1, GNL3	0.315963	13.5276
GOTERM_BP_ALL	GO:0006720~isoprenoid metabolic process	10	0.00822645	AKR1C3, APOA2, AKR1C4, LRAT, DGAT2, HMGCS1, LRP8, IDI1, RDH5, FDFT1	0.336275	14.6448
GOTERM_BP_ALL	GO:0000819~sister chromatid segregation	14	0.00839259	XPO1, SMC5, CENPE, SMC2, SMC3, CUL3, REC8, NCAPH, CEP57, CENPC, TPR, ZWILCH, FEN1, ERCC6L	0.33924	14.9185
GOTERM_BP_ALL	GO:0010556~regulation of macromolecule biosynthetic process	135	0.00847724	XPO1, ZNF823, TBK1, RPS6KB1, CITED4, KANK2, CUL3, ESF1, DDX17, APOA2, CDCA7, CASP8AP2, INSIG1, PSIP1, ZNF443, OGT, CCNA2, RC3H1, GNL3, MTERF1, GTPBP4, MYO6, ZNF100, FOXN2, ZNF816, ELL2, CTDSPL2, SUZ12, SLTM, TRIM33, MTF2, PRDM6, DNTTIP2, PIAS1, NFE2L3, EIF2AK2, ZNF41, HMGB1, SRSF10, ONECUT3, ONECUT2, TIPIN, HSPA1B, TCERG1, DDX3X, P2RY1, ARNTL2, NR1H4, HELLS, EPAS1, MAP2K1, TAF5, BRIP1, SMAD2, ATR…	0.339499	15.0576
GOTERM_BP_ALL	GO:0051252~regulation of RNA metabolic process	125	0.00850871	XPO1, ZNF823, TBK1, CITED4, KANK2, CUL3, ESF1, DDX17, CDCA7, CASP8AP2, SRRM4, INSIG1, PSIP1, ZNF443, PTBP3, PTBP2, OGT, CCNA2, RC3H1, GNL3, MTERF1, MYO6, ZNF100, FOXN2, ZNF816, CTDSPL2, ELL2, SUZ12, SLTM, TRIM33, MTF2, PRDM6, DNTTIP2, PIAS1, NFE2L3, EIF2AK2, ZNF41, HMGB1, SRSF10, ONECUT3, ONECUT2, HSPA1B, TCERG1, DDX3X, P2RY1, ARNTL2, NR1H4, HELLS, EPAS1, MAP2K1, TAF5, BRIP1, SMAD2, ATF5, NUP62, …	0.338041	15.1093
GOTERM_BP_ALL	GO:0045935~positive regulation of nucleobase-containing compound metabolic process	62	0.00870659	GPBP1, TBK1, CITED4, EPCAM, DDX17, ZNF148, INSIG1, PSIP1, HSF4, OGT, MYB, CCNA2, RC3H1, CHUK, GNL3, IHH, CDK1, AR, EXOSC9, MYO6, FOXN2, HLTF, DDN, UBE2N, MTF2, PIAS1, NFE2L3, MED1, SMARCAD1, HMGB1, DRD5, ONECUT3, NANOS1, ONECUT2, NUFIP1, PAXBP1, HSPA1B, PHIP, SUMO2, TFAM, DDX3X, SAFB, AGT, P2RY1, NFAT5, CEBPZ, ARNTL2, HSPA8, NR1H4, EPAS1, MAP2K1, SMAD2, ATAD5, ATR, RLF, DNA2, ATF5, RPS6KA3, TFRC,…	0.341913	15.4335
GOTERM_BP_ALL	GO:0042493~response to drug	21	0.00883045	XPO1, RAP2A, CDK1, HSP90AA1, MYO6, ASS1, HMGCS1, OXTR, RPS6KB1, FZD3, ATR, PNP, ABCG8, APOA2, TFRC, BCHE, SLC22A3, LRP8, CAT, CHUK, HTR1F	0.343375	15.6358
GOTERM_BP_ALL	GO:0010467~gene expression	169	0.00899512	XPO1, MRPL42, PRPF4B, ZNF823, TBK1, SNRPD1, RPS6KB1, CITED4, KANK2, CUL3, ESF1, DDX17, CDCA7, DDX23, CASP8AP2, SRRM4, PPP1R1B, EIF1AX, INSIG1, PSIP1, SRRM1, ZNF443, PTBP3, LSM3, PTBP2, OGT, CCNA2, RC3H1, GNL3, MTERF1, SNRPA1, GTPBP4, MRPL50, ZNF100, MYO6, FOXN2, ZNF816, ELL2, CTDSPL2, SUZ12, SLTM, TRIM33, MTF2, PRDM6, DNTTIP2, PIAS1, EIF2AK2, NFE2L3, SNRPF, ZNF41, HMGB1, SRSF10, ONECUT3, SRSF11, …	0.346075	15.9041
GOTERM_BP_ALL	GO:0097659~nucleic acid-templated transcription	125	0.00919132	XPO1, ZNF823, TBK1, CITED4, KANK2, CUL3, ESF1, DDX17, CDCA7, CASP8AP2, PPP1R1B, INSIG1, PSIP1, SRRM1, ZNF443, OGT, CCNA2, GNL3, MTERF1, MYO6, ZNF100, FOXN2, ZNF816, CTDSPL2, ELL2, SUZ12, SLTM, TRIM33, MTF2, PRDM6, DNTTIP2, PIAS1, SNRPF, NFE2L3, EIF2AK2, ZNF41, HMGB1, SRSF10, ONECUT3, SRSF11, ONECUT2, HSPA1B, TCERG1, DDX3X, P2RY1, ARNTL2, NR1H4, HELLS, EPAS1, MAP2K1, TAF5, BRIP1, SMAD2, ATF5, NUP6…	0.349684	16.2227
GOTERM_BP_ALL	GO:0009891~positive regulation of biosynthetic process	65	0.00946258	GPBP1, TBK1, RPS6KB1, CITED4, EPCAM, DDX17, APOA2, ZNF148, APOA5, INSIG1, PSIP1, HSF4, OGT, MYB, DDAH1, CCNA2, CHUK, GNL3, IHH, KHDRBS1, CDK1, AR, EXOSC9, MYO6, HSP90AA1, NOS1AP, FOXN2, HLTF, DDN, DGAT2, MTF2, PIAS1, NFE2L3, MED1, SMARCAD1, HMGB1, ASS1, DRD5, ONECUT3, ONECUT2, NUFIP1, PAXBP1, PHIP, SUMO2, TFAM, DDX3X, SAFB, AGT, P2RY1, CEBPZ, NFAT5, ARNTL2, NR1H4, EPAS1, MAP2K1, SMAD2, ATR, RLF, …	0.355472	16.6612
GOTERM_BP_ALL	GO:0034249~negative regulation of cellular amide metabolic process	11	0.00984368	EIF4E, METTL14, DDX3X, MAP2K1, DICER1, NANOS1, SMAD2, EIF2AK2, TPR, RC3H1, FXR1	0.364351	17.2737
GOTERM_BP_ALL	GO:0032409~regulation of transporter activity	13	0.0100271	KIF5B, NOS1AP, MINK1, NRXN1, GPD1L, SUMO1, APOA2, SLMAP, AGT, PCSK9, STK39, JPH1, GLRX	0.367252	17.5671
GOTERM_BP_ALL	GO:0032870~cellular response to hormone stimulus	28	0.0100784	QRFPR, ASS1, HMGCS1, OXTR, RPS6KB1, KIT, KANK2, AKR1C3, PHIP, DDX17, AKR1C4, AGT, SAFB, DNAJA1, TBC1D4, PCSK9, OGT, CCNA2, NR1H4, AR, SOCS2, STXBP4, SLIT2, EIF4E, NUP62, AVPR1A, PIAS1, MED1	0.366294	17.6489
GOTERM_BP_ALL	GO:0009725~response to hormone	36	0.0101243	QRFPR, HMGB1, ASS1, HMGCS1, OXTR, RPS6KB1, KIT, KANK2, ACVR1C, AKR1C3, PHIP, APOA2, DDX17, AKR1C4, BCHE, AGT, SAFB, DNAJA1, TBC1D4, PCSK9, CAT, OGT, CCNA2, NR1H4, AR, GNRH1, SOCS2, STXBP4, SLIT2, GJB2, EIF4E, CATSPER2, NUP62, AVPR1A, PIAS1, MED1	0.365196	17.722
GOTERM_BP_ALL	GO:0097384~cellular lipid biosynthetic process	3	0.0102659	FAR1, AGPS, FDFT1	0.366831	17.9473
GOTERM_BP_ALL	GO:0070562~regulation of vitamin D receptor signaling pathway	3	0.0102659	CYP27B1, KANK2, MED1	0.366831	17.9473
GOTERM_BP_ALL	GO:0035725~sodium ion transmembrane transport	10	0.0104425	GPD1L, KIF5B, SLC17A4, AGT, SLMAP, PCSK9, SLC4A7, STK39, SLC4A4, GLRX	0.369417	18.2275
GOTERM_BP_ALL	GO:0034381~plasma lipoprotein particle clearance	5	0.0105728	APOA2, DGAT2, LIPG, PCSK9, NR1H4	0.370671	18.4338
GOTERM_BP_ALL	GO:0045005~DNA-dependent DNA replication maintenance of fidelity	5	0.0105728	FANCM, TIPIN, WRN, ZRANB3, BOD1L1	0.370671	18.4338
GOTERM_BP_ALL	GO:0045944~positive regulation of transcription from RNA polymerase II promoter	42	0.010828	HMGB1, TBK1, ONECUT3, ONECUT2, NUFIP1, PAXBP1, CITED4, PHIP, EPCAM, SUMO2, TFAM, DDX17, DDX3X, ZNF148, SAFB, P2RY1, INSIG1, NFAT5, PSIP1, CEBPZ, ARNTL2, HSF4, OGT, MYB, CHUK, NR1H4, GNL3, IHH, AR, EXOSC9, MYO6, EPAS1, SMAD2, HLTF, DDN, RLF, ATF5, RPS6KA3, MTF2, SUPT16H, MED1, NFIB	0.375318	18.836
GOTERM_BP_ALL	GO:0042127~regulation of cell proliferation	58	0.011178	DICER1, NAP1L1, RPS6KB1, PRDX3, PNP, KANK2, ACVR1C, SSR1, EPCAM, AKR1C3, CUL3, CDCA7, HSF4, PTBP2, FRS2, CCNA2, RC3H1, ASPM, IHH, GNL3, CDK1, AR, GTPBP4, CCDC88A, STXBP4, SUZ12, PIAS1, EIF2AK2, MED1, TNFRSF21, HMGB1, SLC39A10, TIPIN, NMB, PAXBP1, KIT, CDH2, PHIP, CYP27B1, BCHE, AGT, MAP2K1, GNRH1, TRNP1, BRIP1, SMAD2, ATAD5, FZD3, NPR3, EPHA1, ATF5, CORO1A, TFRC, NUP62, AVPR1A, UTP20, FABP7, NFIB	0.382404	19.3848
GOTERM_BP_ALL	GO:0051297~centrosome organization	9	0.0113305	CDK1, XPO1, SLC16A1, SASS6, PLK4, XRCC2, CROCCP3, KIAA0101, CENPJ	0.384092	19.6228
GOTERM_BP_ALL	GO:0048285~organelle fission	28	0.0114322	XRCC2, GDAP1, TIPIN, CD2AP, CUL3, PHIP, FANCM, NCAPH, CEP57, CENPC, TPR, ZWILCH, CCNA2, ASPM, HELLS, ERCC6L, CDK1, OPA1, SMC5, SPIRE1, CENPE, SMC2, SMC3, REC8, TEX15, NUP62, RAD54B, MAP9	0.384415	19.7812
GOTERM_BP_ALL	GO:1903047~mitotic cell cycle process	37	0.0114398	TIPIN, RPS6KB1, CD2AP, KANK2, CUL3, PHIP, TUBB, NCAPH, CEP57, POLE2, DDX3X, MDC1, CENPC, TPR, ZWILCH, CCNA2, HELLS, ASPM, TUBB4B, ERCC6L, KHDRBS1, CDK1, HSP90AA1, SMC5, CENPE, CENPJ, SMC2, SMC3, DNA2, REC8, PLK4, EIF4E, NUP62, TUBA4A, USH1C, PIAS1, MAP9	0.382276	19.793
GOTERM_BP_ALL	GO:0044058~regulation of digestive system process	5	0.0117788	ABCG8, APOA2, APOA5, OXTR, STK39	0.388736	20.3185
GOTERM_BP_ALL	GO:0000722~telomere maintenance via recombination	5	0.0117788	DNA2, POLE2, SMC5, WRN, FEN1	0.388736	20.3185
GOTERM_BP_ALL	GO:0008610~lipid biosynthetic process	28	0.0118977	CHKA, SGPP2, HMGCS1, FDFT1, FAR1, AKR1C3, GPD1L, CYP27B1, AKR1C4, AGPAT5, AGPS, COL4A3BP, ST3GAL6, INSIG1, APOA5, ETNK1, ELOVL6, FRS2, NR1H4, PIGA, MOGAT1, MSMO1, SPTLC2, DGAT2, CYP27A1, SQLE, AVPR1A, IDI1	0.389454	20.5022
GOTERM_BP_ALL	GO:0098813~nuclear chromosome segregation	16	0.0121123	XPO1, SMC5, CENPE, SMC2, SMC3, CUL3, FANCM, REC8, NCAPH, TEX15, CEP57, CENPC, TPR, ZWILCH, FEN1, ERCC6L	0.392571	20.8325
GOTERM_BP_ALL	GO:0043170~macromolecule metabolic process	273	0.0121144	FASTKD1, MRPL42, XRCC2, PGC, CITED4, CD2AP, PRKX, CUL3, PRKY, DDX17, CDCA7, PPP1R1B, EIF1AX, COL4A3BP, INSIG1, LSM3, PTBP3, PTBP2, OGT, CCNA2, MUC13, MTERF1, GTPBP4, MRPL50, ZNF100, MYH3, NAA25, NKTR, EEPD1, CTDSPL2, REC8, MTF2, PRDM6, PIAS1, EIF2AK2, ZNF41, ADAMTS4, SRSF10, TMX3, SRSF11, HSPA1B, GPD1L, ARNTL2, PPP2R2B, POLQ, NR1H4, PRPF40A, MAP2K1, SMAD2, ATR, EPHA1, FXR1, METTL14, NUP62, DCP1A,…	0.390325	20.8357
GOTERM_BP_ALL	GO:0032412~regulation of ion transmembrane transporter activity	12	0.0124146	GPD1L, SUMO1, NOS1AP, KIF5B, AGT, SLMAP, MINK1, PCSK9, STK39, NRXN1, JPH1, GLRX	0.395501	21.2956
GOTERM_BP_ALL	GO:0051052~regulation of DNA metabolic process	19	0.0127263	SMARCAD1, ZNF93, HMGB1, CDK1, GTPBP4, CCDC88A, GMNN, TIPIN, ATAD5, ATR, SMC3, RLF, UBE2N, DNA2, TEX15, TFRC, ZRANB3, POLQ, GNL3	0.400839	21.7705
GOTERM_BP_ALL	GO:0006355~regulation of transcription, DNA-templated	119	0.012731	XPO1, ZNF823, TBK1, CITED4, KANK2, CUL3, ESF1, DDX17, CDCA7, CASP8AP2, INSIG1, PSIP1, ZNF443, OGT, CCNA2, GNL3, MTERF1, MYO6, ZNF100, FOXN2, ZNF816, CTDSPL2, ELL2, SUZ12, SLTM, TRIM33, MTF2, PRDM6, DNTTIP2, PIAS1, NFE2L3, EIF2AK2, ZNF41, HMGB1, SRSF10, ONECUT3, ONECUT2, HSPA1B, TCERG1, DDX3X, P2RY1, ARNTL2, NR1H4, HELLS, EPAS1, MAP2K1, TAF5, BRIP1, SMAD2, ATF5, NUP62, SUPT16H, RAD54B, ZFP14, GPBP…	0.398674	21.7776
GOTERM_BP_ALL	GO:0006366~transcription from RNA polymerase II promoter	66	0.012768	XPO1, TBK1, DICER1, CITED4, KANK2, CUL3, EPCAM, DDX17, ZNF148, INSIG1, PSIP1, SRRM1, HSF4, OGT, TPR, MYB, USP15, CHUK, GNL3, IHH, ZNF280A, AR, EXOSC9, MYO6, ZNF141, HLTF, DDN, CTDSPL2, ELL2, SUZ12, TRIM33, MTF2, GTF2I, PIAS1, THOC2, NFE2L3, SNRPF, TBX18, CPSF2, MED1, HMGB1, ONECUT3, ONECUT2, SRSF11, NUFIP1, PAXBP1, PHIP, SUMO2, TFAM, TCERG1, DDX3X, SAFB, P2RY1, NFAT5, CEBPZ, ARNTL2, NR1H4, EPAS1,…	0.397312	21.8337
GOTERM_BP_ALL	GO:0006351~transcription, DNA-templated	119	0.0129441	XPO1, ZNF823, TBK1, CITED4, KANK2, CUL3, ESF1, DDX17, CDCA7, CASP8AP2, PPP1R1B, INSIG1, PSIP1, SRRM1, ZNF443, OGT, CCNA2, GNL3, MTERF1, MYO6, ZNF100, FOXN2, ZNF816, CTDSPL2, ELL2, SUZ12, SLTM, TRIM33, MTF2, PRDM6, DNTTIP2, PIAS1, SNRPF, NFE2L3, EIF2AK2, ZNF41, HMGB1, ONECUT3, SRSF11, ONECUT2, HSPA1B, TCERG1, DDX3X, P2RY1, ARNTL2, NR1H4, HELLS, EPAS1, MAP2K1, TAF5, BRIP1, SMAD2, ATF5, NUP62, SUPT1…	0.399288	22.1006
GOTERM_BP_ALL	GO:0000288~nuclear-transcribed mRNA catabolic process, deadenylation-dependent decay	7	0.0134094	PATL1, EIF4E, EXOSC9, DCP1A, NANOS1, LSM3, RC3H1	0.408003	22.8014
GOTERM_BP_ALL	GO:0033962~cytoplasmic mRNA processing body assembly	4	0.0139486	PATL1, ATXN2, LSM3, RC3H1	0.41816	23.6063
GOTERM_BP_ALL	GO:0008283~cell proliferation	67	0.0140139	USPL1, TBK1, DICER1, NAP1L1, RPS6KB1, PRDX3, PNP, PRKX, KANK2, ACVR1C, SSR1, EPCAM, AKR1C3, CUL3, SCRG1, COL4A3BP, INSIG1, HSF4, PTBP2, FRS2, CCNA2, RC3H1, ASPM, IHH, GNL3, KHDRBS1, CDK1, AR, GTPBP4, STXBP4, SUZ12, EIF2AK2, MED1, TNFRSF21, HMGB1, SLC39A10, TIPIN, NMB, PAXBP1, KIT, CDH2, PHIP, CYP27B1, BCHE, FAT4, AGT, HELLS, POLR3G, TRNP1, MAP2K1, GNRH1, NASP, BRIP1, FZD3, SMAD2, ATAD5, NPR3, EPH…	0.417383	23.7032
GOTERM_BP_ALL	GO:0030300~regulation of intestinal cholesterol absorption	3	0.0141155	ABCG8, APOA2, APOA5	0.417433	23.8537
GOTERM_BP_ALL	GO:1903608~protein localization to cytoplasmic stress granule	3	0.0141155	DDX3X, DCP1A, SSB	0.417433	23.8537
GOTERM_BP_ALL	GO:1904729~regulation of intestinal lipid absorption	3	0.0141155	ABCG8, APOA2, APOA5	0.417433	23.8537
GOTERM_BP_ALL	GO:1901617~organic hydroxy compound biosynthetic process	11	0.0142264	AKR1C3, MSMO1, CYP27B1, SPTLC2, SQLE, INSIG1, P2RY1, APOA5, HMGCS1, IDI1, FDFT1	0.41769	24.0178
GOTERM_BP_ALL	GO:0019827~stem cell population maintenance	10	0.0142628	EIF4E, METTL14, EPAS1, MTF2, SMAD2, KIT, CDH2, EPHA1, ASPM, SMC3	0.416291	24.0715
GOTERM_BP_ALL	GO:0007067~mitotic nuclear division	21	0.0143025	CDK1, TIPIN, SMC5, CENPE, SMC2, CD2AP, SMC3, CUL3, PHIP, REC8, NCAPH, NUP62, CEP57, CENPC, TPR, ZWILCH, MAP9, CCNA2, ASPM, HELLS, ERCC6L	0.414984	24.1302
GOTERM_BP_ALL	GO:0003009~skeletal muscle contraction	5	0.014447	HSP90AA1, TCAP, MYH3, RPS6KB1, CHUK	0.415989	24.3431
GOTERM_BP_ALL	GO:0006275~regulation of DNA replication	9	0.0144722	CDK1, DNA2, GTPBP4, CCDC88A, GMNN, TIPIN, ATR, ZRANB3, SMC3	0.414383	24.3802
GOTERM_BP_ALL	GO:0071705~nitrogen compound transport	31	0.0148557	XPO1, SYT4, SRSF10, SRSF11, OXTR, ACVR1C, STXBP5L, SLC16A1, NPAP1, AQP11, AGT, COL4A3BP, P2RY1, SLC35B4, SRRM1, SLC22A3, TPR, NR1H4, KHDRBS1, UPF2, SLC12A2, KIF5B, SMAD2, STXBP4, NRXN1, GJB1, ATXN2, EIF4E, NUP62, THOC2, CPSF2	0.420529	24.9423
GOTERM_BP_ALL	GO:0022898~regulation of transmembrane transporter activity	12	0.0149011	GPD1L, SUMO1, NOS1AP, KIF5B, AGT, SLMAP, MINK1, PCSK9, STK39, NRXN1, JPH1, GLRX	0.419359	25.0086
GOTERM_BP_ALL	GO:0045893~positive regulation of transcription, DNA-templated	51	0.0150856	GPBP1, TBK1, CITED4, EPCAM, DDX17, ZNF148, INSIG1, PSIP1, HSF4, OGT, MYB, CCNA2, CHUK, IHH, GNL3, AR, EXOSC9, MYO6, FOXN2, DDN, HLTF, MTF2, PIAS1, NFE2L3, MED1, SMARCAD1, HMGB1, ONECUT3, ONECUT2, NUFIP1, PAXBP1, PHIP, SUMO2, TFAM, DDX3X, SAFB, AGT, P2RY1, NFAT5, CEBPZ, ARNTL2, NR1H4, EPAS1, MAP2K1, SMAD2, RLF, ATF5, RPS6KA3, NUP62, SUPT16H, NFIB	0.421148	25.2773
GOTERM_BP_ALL	GO:1903508~positive regulation of nucleic acid-templated transcription	51	0.0150856	GPBP1, TBK1, CITED4, EPCAM, DDX17, ZNF148, INSIG1, PSIP1, HSF4, OGT, MYB, CCNA2, CHUK, IHH, GNL3, AR, EXOSC9, MYO6, FOXN2, DDN, HLTF, MTF2, PIAS1, NFE2L3, MED1, SMARCAD1, HMGB1, ONECUT3, ONECUT2, NUFIP1, PAXBP1, PHIP, SUMO2, TFAM, DDX3X, SAFB, AGT, P2RY1, NFAT5, CEBPZ, ARNTL2, NR1H4, EPAS1, MAP2K1, SMAD2, RLF, ATF5, RPS6KA3, NUP62, SUPT16H, NFIB	0.421148	25.2773
GOTERM_BP_ALL	GO:0071407~cellular response to organic cyclic compound	24	0.0152449	AR, ASS1, MAP2K1, GABRB2, DRD5, DICER1, HMGCS1, SMAD2, RPS6KB1, KANK2, AKR1C3, DDX17, SLC16A1, CYP27B1, EIF4E, SAFB, P2RY1, SP5, DNAJA1, LRP8, PIAS1, CCNA2, NR1H4, MED1	0.422383	25.5087
GOTERM_BP_ALL	GO:1903506~regulation of nucleic acid-templated transcription	119	0.0152468	XPO1, ZNF823, TBK1, CITED4, KANK2, CUL3, ESF1, DDX17, CDCA7, CASP8AP2, INSIG1, PSIP1, ZNF443, OGT, CCNA2, GNL3, MTERF1, MYO6, ZNF100, FOXN2, ZNF816, CTDSPL2, ELL2, SUZ12, SLTM, TRIM33, MTF2, PRDM6, DNTTIP2, PIAS1, NFE2L3, EIF2AK2, ZNF41, HMGB1, SRSF10, ONECUT3, ONECUT2, HSPA1B, TCERG1, DDX3X, P2RY1, ARNTL2, NR1H4, HELLS, EPAS1, MAP2K1, TAF5, BRIP1, SMAD2, ATF5, NUP62, SUPT16H, RAD54B, ZFP14, GPBP…	0.420318	25.5114
GOTERM_BP_ALL	GO:0000070~mitotic sister chromatid segregation	10	0.0155228	CUL3, REC8, NCAPH, CEP57, CENPC, SMC5, CENPE, TPR, SMC2, SMC3	0.423958	25.9107
GOTERM_BP_ALL	GO:0098727~maintenance of cell number	10	0.0161827	EIF4E, METTL14, EPAS1, MTF2, SMAD2, KIT, CDH2, EPHA1, ASPM, SMC3	0.435296	26.8568
GOTERM_BP_ALL	GO:0000280~nuclear division	26	0.016737	XRCC2, TIPIN, CD2AP, PHIP, CUL3, FANCM, NCAPH, CEP57, CENPC, TPR, ZWILCH, CCNA2, HELLS, ASPM, ERCC6L, CDK1, SMC5, SPIRE1, CENPE, SMC2, SMC3, REC8, TEX15, NUP62, RAD54B, MAP9	0.444205	27.6428
GOTERM_BP_ALL	GO:0046700~heterocycle catabolic process	20	0.0172424	AADAT, HMGB1, UPF2, EXOSC9, DICER1, NANOS1, SKIV2L2, PNP, PATL1, DNA2, EIF4E, RPL22, DCP1A, AOX1, LSM3, CAT, TPR, NT5E, RC3H1, FEN1	0.451925	28.3525
GOTERM_BP_ALL	GO:0007618~mating	5	0.0174691	PPP1R1B, DRD5, P2RY1, AVPR1A, OXTR	0.45415	28.6685
GOTERM_BP_ALL	GO:2001141~regulation of RNA biosynthetic process	119	0.0177444	XPO1, ZNF823, TBK1, CITED4, KANK2, CUL3, ESF1, DDX17, CDCA7, CASP8AP2, INSIG1, PSIP1, ZNF443, OGT, CCNA2, GNL3, MTERF1, MYO6, ZNF100, FOXN2, ZNF816, CTDSPL2, ELL2, SUZ12, SLTM, TRIM33, MTF2, PRDM6, DNTTIP2, PIAS1, NFE2L3, EIF2AK2, ZNF41, HMGB1, SRSF10, ONECUT3, ONECUT2, HSPA1B, TCERG1, DDX3X, P2RY1, ARNTL2, NR1H4, HELLS, EPAS1, MAP2K1, TAF5, BRIP1, SMAD2, ATF5, NUP62, SUPT16H, RAD54B, ZFP14, GPBP…	0.457259	29.0508
GOTERM_BP_ALL	GO:0051028~mRNA transport	10	0.0182856	XPO1, UPF2, EIF4E, NUP62, SRSF10, SRSF11, SRRM1, TPR, THOC2, CPSF2	0.465246	29.7964
GOTERM_BP_ALL	GO:0018158~protein oxidation	3	0.0184852	APOA2, TMX3, PRDX3	0.466802	30.0695
GOTERM_BP_ALL	GO:0045924~regulation of female receptivity	3	0.0184852	PPP1R1B, DRD5, AVPR1A	0.466802	30.0695
GOTERM_BP_ALL	GO:0043084~penile erection	3	0.0184852	P2RY1, AVPR1A, OXTR	0.466802	30.0695
GOTERM_BP_ALL	GO:0006810~transport	148	0.0186048	XPO1, SEC31B, SYT4, GABRB2, SNRPD1, RPS6KB1, PNP, CD2AP, SSR1, HOOK1, CUL3, NPAP1, SLC16A1, APOA2, AQP11, COL4A3BP, INSIG1, APOA5, KCNK5, PSIP1, SRRM1, STK39, SLC51A, SLC4A4, HTR1F, MYO6, CEP83, OPA1, KIF5B, SPIRE1, DCTN6, CTDSPL2, LRAT, CATSPER2, TUBA4A, SNRPF, GC, CHKA, HMGB1, SRSF10, SRSF11, TMX3, HSPA1B, BLOC1S6, GPD1L, TUBB, P2RY1, DNAJA1, NR1H4, TRPC3, MAP2K1, SMAD2, NIPA1, HBA2, WRN, ATP13…	0.466882	30.2326
GOTERM_BP_ALL	GO:0031023~microtubule organizing center organization	9	0.0190263	CDK1, XPO1, SLC16A1, SASS6, PLK4, XRCC2, CROCCP3, KIAA0101, CENPJ	0.472394	30.8048
GOTERM_BP_ALL	GO:0044839~cell cycle G2/M phase transition	12	0.0191509	KHDRBS1, ATF5, CDK1, TUBB, PLK4, HSP90AA1, CEP57, USH1C, TUBA4A, CCNA2, CENPJ, TUBB4B	0.472529	30.9731
GOTERM_BP_ALL	GO:1901361~organic cyclic compound catabolic process	21	0.0194281	AADAT, HMGB1, UPF2, EXOSC9, DICER1, NANOS1, SKIV2L2, PNP, PATL1, DNA2, CYP27B1, EIF4E, RPL22, DCP1A, AOX1, LSM3, CAT, TPR, NT5E, RC3H1, FEN1	0.475353	31.3461
GOTERM_BP_ALL	GO:1902680~positive regulation of RNA biosynthetic process	51	0.0196847	GPBP1, TBK1, CITED4, EPCAM, DDX17, ZNF148, INSIG1, PSIP1, HSF4, OGT, MYB, CCNA2, CHUK, IHH, GNL3, AR, EXOSC9, MYO6, FOXN2, DDN, HLTF, MTF2, PIAS1, NFE2L3, MED1, SMARCAD1, HMGB1, ONECUT3, ONECUT2, NUFIP1, PAXBP1, PHIP, SUMO2, TFAM, DDX3X, SAFB, AGT, P2RY1, NFAT5, CEBPZ, ARNTL2, NR1H4, EPAS1, MAP2K1, SMAD2, RLF, ATF5, RPS6KA3, NUP62, SUPT16H, NFIB	0.477772	31.6897
GOTERM_BP_ALL	GO:0031323~regulation of cellular metabolic process	181	0.0197393	XPO1, ZNF823, TBK1, RPS6KB1, CITED4, KANK2, ESF1, CUL3, DDX17, APOA2, CDCA7, CASP8AP2, SRRM4, PPP1R1B, INSIG1, APOA5, PSIP1, ZNF443, STK39, PTBP3, PTBP2, OGT, FRS2, CCNA2, DDAH1, RC3H1, GNL3, MTERF1, PDPR, GTPBP4, ZNF100, MYO6, SOCS2, SPTLC2, FOXN2, ZNF816, ELL2, CTDSPL2, SUZ12, SLTM, TRIM33, MTF2, PRDM6, DNTTIP2, PIAS1, EIF2AK2, NFE2L3, DCUN1D4, ZNF41, HMGB1, SRSF10, ASS1, ONECUT3, DRD5, ONECUT2…	0.476658	31.7625
GOTERM_BP_ALL	GO:0044270~cellular nitrogen compound catabolic process	20	0.0201583	AADAT, HMGB1, UPF2, EXOSC9, DICER1, NANOS1, SKIV2L2, PNP, PATL1, DNA2, EIF4E, RPL22, DCP1A, AOX1, LSM3, CAT, TPR, NT5E, RC3H1, FEN1	0.481814	32.3195
GOTERM_BP_ALL	GO:0032774~RNA biosynthetic process	126	0.0203893	XPO1, ZNF823, TBK1, CITED4, KANK2, CUL3, ESF1, DDX17, CDCA7, CASP8AP2, PPP1R1B, INSIG1, PSIP1, SRRM1, ZNF443, OGT, CCNA2, GNL3, MTERF1, MYO6, ZNF100, FOXN2, ZNF816, CTDSPL2, ELL2, SUZ12, SLTM, TRIM33, MTF2, PRDM6, DNTTIP2, PIAS1, SNRPF, NFE2L3, EIF2AK2, ZNF41, HMGB1, SRSF10, ONECUT3, SRSF11, ONECUT2, HSPA1B, TCERG1, DDX3X, P2RY1, ARNTL2, NR1H4, HELLS, EPAS1, MAP2K1, TAF5, BRIP1, SMAD2, ATF5, NUP6…	0.483693	32.6248
GOTERM_BP_ALL	GO:0018193~peptidyl-amino acid modification	45	0.0211934	USPL1, FKBP5, TBK1, KMT2C, TMX3, SPINK1, PRDX3, KIT, PRKX, GPD1L, SUMO2, SUMO1, APOA2, TTBK2, MDC1, AGT, ST3GAL6, STK39, OGT, TPR, MYB, NR1H4, GNL3, CDK1, HSP90AA1, NOS1AP, MAP2K1, TAF5, SMC5, NAA25, ATR, WRN, EPHA1, SMC3, NKTR, RLF, PPIG, NUP62, MTF2, PRDM6, NOP58, LRP8, PIAS1, EIF2AK2, FKBP11	0.495058	33.6771
GOTERM_BP_ALL	GO:0060135~maternal process involved in female pregnancy	6	0.0217734	AR, CYP27B1, PRDX3, GJB2, IHH, MED1	0.502452	34.4263
GOTERM_BP_ALL	GO:0019439~aromatic compound catabolic process	20	0.0224535	AADAT, HMGB1, UPF2, EXOSC9, DICER1, NANOS1, SKIV2L2, PNP, PATL1, DNA2, EIF4E, RPL22, DCP1A, AOX1, LSM3, CAT, TPR, NT5E, RC3H1, FEN1	0.511238	35.2947
GOTERM_BP_ALL	GO:0022008~neurogenesis	53	0.0225743	XRCC2, SYT4, GABRB2, DICER1, RTN1, KLHL1, ARHGAP4, WDR36, SEMA3F, S1PR5, APOA5, SEMA3D, FRS2, ASPM, ZNF280A, RAP2A, CDK1, HSP90AA1, CCDC88A, OPA1, KIF5B, MINK1, NRXN1, SLIT2, ARL3, PRDM6, THOC2, MED1, TNFRSF21, HMGB1, NANOS1, ONECUT2, CTNND2, ASTN1, KIT, CDH2, BLOC1S6, NPTX1, BCHE, FAT4, DNER, P2RY1, SLC4A7, PCSK9, B3GNT2, MAP2K1, GNRH1, FZD3, ATF5, EIF4E, LRP8, FABP7, NFIB	0.511085	35.4478
GOTERM_BP_ALL	GO:0006457~protein folding	13	0.0229049	ERP44, TMX1, PPIG, HSP90AA1, FKBP5, TMX3, DNAJA1, DNAJC21, HSPA1B, FKBP11, HSP90AA2P, NKTR, HSPA8	0.514195	35.8652
GOTERM_BP_ALL	GO:1904478~regulation of intestinal absorption	3	0.0233441	ABCG8, APOA2, APOA5	0.51891	36.4155
GOTERM_BP_ALL	GO:0060180~female mating behavior	3	0.0233441	PPP1R1B, DRD5, AVPR1A	0.51891	36.4155
GOTERM_BP_ALL	GO:0010873~positive regulation of cholesterol esterification	3	0.0233441	APOA2, AGT, APOA5	0.51891	36.4155
GOTERM_BP_ALL	GO:0071496~cellular response to external stimulus	14	0.0234886	BRIP1, WRN, KANK2, AKR1C3, DAPL1, CYP27B1, CASP8AP2, AGT, MAP3K1, AVPR1A, PCSK9, EIF2AK2, HSPA8, NR1H4	0.51908	36.5956
GOTERM_BP_ALL	GO:0007062~sister chromatid cohesion	9	0.0235371	XPO1, REC8, CENPC, SMC5, CENPE, ZWILCH, SMC3, FEN1, ERCC6L	0.517798	36.6559
GOTERM_BP_ALL	GO:0048699~generation of neurons	50	0.0245795	HMGB1, TNFRSF21, XRCC2, SYT4, GABRB2, NANOS1, DICER1, ONECUT2, ASTN1, CTNND2, CDH2, KIT, RTN1, KLHL1, ARHGAP4, BLOC1S6, NPTX1, WDR36, BCHE, FAT4, SEMA3F, DNER, APOA5, S1PR5, SEMA3D, PCSK9, SLC4A7, B3GNT2, FRS2, ASPM, ZNF280A, CDK1, RAP2A, OPA1, CCDC88A, HSP90AA1, GNRH1, MAP2K1, KIF5B, MINK1, FZD3, NRXN1, SLIT2, ARL3, ATF5, EIF4E, LRP8, THOC2, MED1, NFIB	0.531289	37.9397
GOTERM_BP_ALL	GO:0051301~cell division	25	0.0252047	TIPIN, KIT, CD2AP, CUL3, NCAPH, TUBB, CDCA7, CENPC, CAT, TPR, ZWILCH, CCNA2, HELLS, ASPM, ERCC6L, PRPF40A, CDK1, SMC5, CENPE, SPIRE1, SMC2, CENPJ, SMC3, ARL3, MAP9	0.538328	38.6979
GOTERM_BP_ALL	GO:0002028~regulation of sodium ion transport	7	0.0253285	GPD1L, KIF5B, AGT, SLMAP, PCSK9, STK39, GLRX	0.538089	38.8469
GOTERM_BP_ALL	GO:0000724~double-strand break repair via homologous recombination	7	0.0253285	UBE2N, REC8, XRCC2, SMC5, RAD54B, POLQ, FEN1	0.538089	38.8469
GOTERM_BP_ALL	GO:0006721~terpenoid metabolic process	8	0.0254435	AKR1C3, APOA2, AKR1C4, LRAT, DGAT2, LRP8, RDH5, FDFT1	0.537728	38.9851
GOTERM_BP_ALL	GO:0019222~regulation of metabolic process	189	0.0255094	XPO1, ZNF823, TBK1, RPS6KB1, CITED4, KANK2, ESF1, CUL3, DDX17, APOA2, CDCA7, CASP8AP2, SRRM4, PPP1R1B, INSIG1, APOA5, PSIP1, ZNF443, STK39, PTBP3, PTBP2, OGT, FRS2, CCNA2, DDAH1, RC3H1, GNL3, MTERF1, PDPR, GTPBP4, ZNF100, MYO6, SOCS2, SPTLC2, FOXN2, ZNF816, ELL2, CTDSPL2, SUZ12, SLTM, TRIM33, MTF2, PRDM6, DNTTIP2, PIAS1, EIF2AK2, NFE2L3, DCUN1D4, ZNF41, HMGB1, SRSF10, ASS1, ONECUT3, DRD5, ONECUT2…	0.536675	39.0641
GOTERM_BP_ALL	GO:0044770~cell cycle phase transition	24	0.0263468	KHDRBS1, CDK1, HSP90AA1, TIPIN, RPS6KB1, ATAD5, CENPE, STXBP4, CENPJ, KANK2, CUL3, ATF5, PLK4, TUBB, EIF4E, DDX3X, CEP57, POLE2, USH1C, TUBA4A, PIAS1, TPR, CCNA2, TUBB4B	0.546395	40.0601
GOTERM_BP_ALL	GO:0007263~nitric oxide mediated signal transduction	4	0.026372	NOS1AP, AGT, SPINK1, DDAH1	0.544767	40.0897
GOTERM_BP_ALL	GO:0034368~protein-lipid complex remodeling	4	0.026372	APOA2, AGT, APOA5, LIPG	0.544767	40.0897
GOTERM_BP_ALL	GO:0034367~macromolecular complex remodeling	4	0.026372	APOA2, AGT, APOA5, LIPG	0.544767	40.0897
GOTERM_BP_ALL	GO:0034369~plasma lipoprotein particle remodeling	4	0.026372	APOA2, AGT, APOA5, LIPG	0.544767	40.0897
GOTERM_BP_ALL	GO:0016571~histone methylation	9	0.0265782	SUZ12, RLF, MTF2, KMT2C, PRDM6, PAXBP1, OGT, MYB, NR1H4	0.545633	40.3326
GOTERM_BP_ALL	GO:0006284~base-excision repair	5	0.0266488	HMGB1, DNA2, WRN, POLQ, FEN1	0.544644	40.4155
GOTERM_BP_ALL	GO:0000725~recombinational repair	7	0.0266758	UBE2N, REC8, XRCC2, SMC5, RAD54B, POLQ, FEN1	0.543071	40.4472
GOTERM_BP_ALL	GO:0046907~intracellular transport	57	0.0268918	XPO1, ATL2, TIMM17A, SNRPD1, SSR1, HOOK1, AKR1C3, CUL3, NPAP1, COL4A3BP, INSIG1, PSIP1, SRRM1, ATP5O, YOD1, TPR, KHDRBS1, ABCE1, CDK1, HSP90AA1, MYO6, OPA1, KIF5B, ANP32E, SPIRE1, STXBP4, DCTN6, TIMM21, CTDSPL2, THOC2, KPNA3, SNRPF, CPSF2, MED1, SRSF10, SRSF11, GDAP1, PPP6R3, KIT, BLOC1S6, TUBB, CEP57, GNPTAB, AGT, TBC1D4, TNPO1, HSPA8, NEMF, UPF2, MAP2K1, WRN, CORO1A, EIF4E, NUP62, RPL22, RSRC1,…	0.544067	40.6999
GOTERM_BP_ALL	GO:0051234~establishment of localization	150	0.0274737	XPO1, SEC31B, SYT4, GABRB2, SNRPD1, RPS6KB1, PNP, CD2AP, SSR1, HOOK1, CUL3, NPAP1, SLC16A1, APOA2, AQP11, COL4A3BP, INSIG1, APOA5, KCNK5, PSIP1, SRRM1, STK39, SLC51A, SLC4A4, HTR1F, MYO6, CEP83, OPA1, KIF5B, SPIRE1, DCTN6, CTDSPL2, LRAT, CATSPER2, TUBA4A, SNRPF, GC, CHKA, HMGB1, SRSF10, TMX3, SRSF11, HSPA1B, BLOC1S6, GPD1L, TUBB, P2RY1, DNAJA1, NR1H4, TRPC3, MAP2K1, SMAD2, NIPA1, HBA2, WRN, ATR, …	0.54993	41.376
GOTERM_BP_ALL	GO:0010557~positive regulation of macromolecule biosynthetic process	57	0.0279316	GPBP1, TBK1, RPS6KB1, CITED4, EPCAM, DDX17, APOA2, ZNF148, INSIG1, PSIP1, HSF4, OGT, MYB, CCNA2, CHUK, IHH, GNL3, KHDRBS1, CDK1, AR, EXOSC9, MYO6, FOXN2, HLTF, DDN, MTF2, PIAS1, NFE2L3, MED1, SMARCAD1, HMGB1, ONECUT3, ONECUT2, NUFIP1, PAXBP1, PHIP, SUMO2, TFAM, DDX3X, SAFB, AGT, P2RY1, NFAT5, CEBPZ, ARNTL2, NR1H4, EPAS1, MAP2K1, SMAD2, ATR, RLF, DNA2, ATF5, RPS6KA3, NUP62, SUPT16H, NFIB	0.554041	41.9029
GOTERM_BP_ALL	GO:0000018~regulation of DNA recombination	6	0.0280211	SMARCAD1, TEX15, TFRC, ATAD5, ZRANB3, POLQ	0.553301	42.0054
GOTERM_BP_ALL	GO:0000086~G2/M transition of mitotic cell cycle	11	0.0280466	KHDRBS1, CDK1, TUBB, PLK4, HSP90AA1, CEP57, USH1C, TUBA4A, CCNA2, CENPJ, TUBB4B	0.551734	42.0346
GOTERM_BP_ALL	GO:0033160~positive regulation of protein import into nucleus, translocation	3	0.0286625	CDK1, HSP90AA1, MED1	0.557781	42.7346
GOTERM_BP_ALL	GO:0033148~positive regulation of intracellular estrogen receptor signaling pathway	3	0.0286625	AR, DDX17, MED1	0.557781	42.7346
GOTERM_BP_ALL	GO:0031960~response to corticosteroid	10	0.0287036	AKR1C3, HMGB1, APOA2, EIF4E, GNRH1, ASS1, BCHE, AVPR1A, RPS6KB1, SLIT2	0.556423	42.7811
GOTERM_BP_ALL	GO:1903311~regulation of mRNA metabolic process	9	0.0287512	KHDRBS1, SLTM, SRSF10, SRRM4, SAFB, NANOS1, HSPA1B, RC3H1, HSPA8	0.555155	42.8347
GOTERM_BP_ALL	GO:0022408~negative regulation of cell-cell adhesion	9	0.0287512	EPCAM, TNFRSF21, HMGB1, GTPBP4, GNRH1, ASS1, RC3H1, LAG3, IHH	0.555155	42.8347
GOTERM_BP_ALL	GO:0045429~positive regulation of nitric oxide biosynthetic process	5	0.0287721	HSP90AA1, NOS1AP, ASS1, AGT, DDAH1	0.55356	42.8583
GOTERM_BP_ALL	GO:1904407~positive regulation of nitric oxide metabolic process	5	0.0287721	HSP90AA1, NOS1AP, ASS1, AGT, DDAH1	0.55356	42.8583
GOTERM_BP_ALL	GO:0030520~intracellular estrogen receptor signaling pathway	5	0.0287721	AR, DDX17, SAFB, KANK2, MED1	0.55356	42.8583
GOTERM_BP_ALL	GO:0001655~urogenital system development	16	0.0289687	AR, ASS1, SMAD2, RRM2B, SLIT2, PRKX, ARL3, EPCAM, FAT4, AQP11, AGT, PCSK9, CAT, FRS2, TBX18, HELLS	0.554197	43.0797
GOTERM_BP_ALL	GO:0080090~regulation of primary metabolic process	178	0.0293269	XPO1, ZNF823, TBK1, RPS6KB1, CITED4, KANK2, CUL3, ESF1, DDX17, APOA2, CDCA7, CASP8AP2, SRRM4, PPP1R1B, INSIG1, APOA5, PSIP1, ZNF443, STK39, PTBP3, PTBP2, OGT, FRS2, CCNA2, RC3H1, GNL3, MTERF1, PDPR, GTPBP4, ZNF100, MYO6, SOCS2, SPTLC2, FOXN2, ZNF816, ELL2, CTDSPL2, SUZ12, SLTM, TRIM33, MTF2, PRDM6, DNTTIP2, PIAS1, EIF2AK2, NFE2L3, DCUN1D4, ZNF41, HMGB1, SRSF10, ONECUT3, DRD5, ONECUT2, TIPIN, HSPA…	0.556848	43.4808
GOTERM_BP_ALL	GO:0018205~peptidyl-lysine modification	19	0.0294664	USPL1, TAF5, KMT2C, SMC5, WRN, SMC3, RLF, SUMO2, SUMO1, NUP62, MTF2, MDC1, PRDM6, NOP58, PIAS1, OGT, TPR, MYB, GNL3	0.55675	43.6363
GOTERM_BP_ALL	GO:0022600~digestive system process	7	0.0295111	ABCG8, APOA2, APOA5, OXTR, STK39, NPR3, MUC13	0.55548	43.686
GOTERM_BP_ALL	GO:0031669~cellular response to nutrient levels	10	0.0297273	AKR1C3, DAPL1, CYP27B1, PCSK9, BRIP1, WRN, EIF2AK2, HSPA8, NR1H4, KANK2	0.556336	43.9261
GOTERM_BP_ALL	GO:0034655~nucleobase-containing compound catabolic process	18	0.0307098	HMGB1, UPF2, EXOSC9, DICER1, NANOS1, SKIV2L2, PNP, PATL1, DNA2, EIF4E, RPL22, DCP1A, LSM3, CAT, TPR, NT5E, RC3H1, FEN1	0.56646	45.0046
GOTERM_BP_ALL	GO:0010501~RNA secondary structure unwinding	5	0.030993	DDX17, DDX55, DDX23, DDX3X, DDX3Y	0.568032	45.3118
GOTERM_BP_ALL	GO:0050881~musculoskeletal movement	5	0.030993	HSP90AA1, TCAP, MYH3, RPS6KB1, CHUK	0.568032	45.3118
GOTERM_BP_ALL	GO:0050879~multicellular organismal movement	5	0.030993	HSP90AA1, TCAP, MYH3, RPS6KB1, CHUK	0.568032	45.3118
GOTERM_BP_ALL	GO:0009408~response to heat	7	0.031	SUMO1, HSP90AA1, PSIP1, DNAJA1, RPS6KB1, HSPA1B, TPR	0.566316	45.3194
GOTERM_BP_ALL	GO:0007017~microtubule-based process	26	0.0311018	XPO1, XRCC2, KIAA0101, BLOC1S6, SLC16A1, TUBB, CEP57, TUBB6, TPR, KIF21A, ASPM, TUBB4B, CDK1, OPA1, KIF5B, CROCCP3, CENPE, SPIRE1, CENPJ, ARL3, ATF5, SASS6, PLK4, TUBA8, TUBA4A, MAP9	0.565733	45.4293
GOTERM_BP_ALL	GO:0071822~protein complex subunit organization	59	0.0312686	LIMA1, MRPL42, ATL2, COA4, CAPZA1, NAP1L1, CD2AP, UXS1, CUL3, ZNF148, AQP11, INSIG1, CAT, HSF4, TPR, ABCE1, CDK1, AR, MRPL50, HSP90AA1, OPA1, ANP32E, SPIRE1, NRXN1, THEG, SLIT2, TIMM21, USH1C, KPNA3, EIF2AK2, ATPAF1, SMARCAD1, HMGB1, TCAP, ACTR3B, NUFIP1, PPP6R3, CX3CL1, TFAM, SUMO1, CEP57, DDX3X, CENPC, POLQ, TNPO1, HSPA8, GMNN, NASP, CENPE, SMAD2, HBA2, CRYZ, SMC2, CENPJ, GJB1, CORO1A, COL14A1,…	0.565921	45.6091
GOTERM_BP_ALL	GO:0006970~response to osmotic stress	6	0.03153	HSP90AA1, TSC22D2, DDX3X, SLC12A2, NFAT5, STK39	0.567215	45.8898
GOTERM_BP_ALL	GO:0032502~developmental process	173	0.0318353	MPZL2, CRYGS, XRCC2, SYT4, GABRB2, RPS6KB1, PNP, CITED4, PRKX, KLHL1, HOOK1, CUL3, DDX17, NPAP1, APOA2, SRRM4, AQP11, COL4A3BP, AARD, INSIG1, APOA5, S1PR5, PTBP3, PTBP2, OGT, FRS2, CCNA2, DDAH1, RC3H1, ASPM, CEP83, OPA1, KIF5B, MYH3, FOXN2, MGP, REC8, CDKL1, CEP162, CATSPER2, MTF2, PRDM6, PIAS1, EIF2AK2, PRPS2, ADAMTS4, HMGB1, ASS1, ONECUT3, ONECUT2, ASTN1, HMGCS1, RRM2B, CX3CL1, NHS, BLOC1S6, TT…	0.569002	46.2159
GOTERM_BP_ALL	GO:0007565~female pregnancy	11	0.0318748	AR, CYP27B1, GNRH1, AGT, OXTR, PRDX3, ACVR1C, GJB2, IHH, TAC3, MED1	0.567703	46.2579
GOTERM_BP_ALL	GO:0060249~anatomical structure homeostasis	17	0.0319172	EPAS1, NANOS1, SMC5, WRN, PIGR, ATR, DNA2, CORO1A, WDR36, TEX15, TFRC, POLE2, USH1C, STK39, MUC13, FEN1, GNL3	0.566446	46.303
GOTERM_BP_ALL	GO:0000732~strand displacement	4	0.0325602	DNA2, XRCC2, BRIP1, WRN	0.572061	46.9825
GOTERM_BP_ALL	GO:1902589~single-organism organelle organization	57	0.0327666	XPO1, LIMA1, XRCC2, SYT4, CAPZA1, CD2AP, KLHL1, CUL3, SLC16A1, COL4A3BP, POLG2, TPR, ASPM, CDK1, RAP2A, HSP90AA1, CEP83, OPA1, KIF5B, MYH3, MINK1, SPIRE1, SLIT2, ARL3, MFN1, REC8, SASS6, CEP162, TCAP, ACTR3B, ONECUT2, GDAP1, KIAA0101, KIT, HSPA1B, TUBB, NCAPH, TTBK2, CEP57, CENPC, TBC1D4, ZWILCH, FEN1, ERCC6L, CROCCP3, SMC5, CENPE, MYOZ3, SMC2, CENPJ, EPHA1, SMC3, DNA2, ATF5, PLK4, CORO1A, MAP9	0.572661	47.199
GOTERM_BP_ALL	GO:0031668~cellular response to extracellular stimulus	11	0.0328866	AKR1C3, DAPL1, CYP27B1, AVPR1A, PCSK9, BRIP1, WRN, EIF2AK2, HSPA8, NR1H4, KANK2	0.572286	47.3244
GOTERM_BP_ALL	GO:0009719~response to endogenous stimulus	55	0.0330126	QRFPR, GABRB2, RPS6KB1, KANK2, ACVR1C, AKR1C3, APOA2, DDX17, AKR1C4, PPP1R1B, CAT, OGT, TPR, FRS2, USP15, CCNA2, CHUK, CDK1, AR, HSP90AA1, SOCS2, STXBP4, SLIT2, NLRP1, CTDSPL2, TRIM33, CATSPER2, PIAS1, MED1, HMGB1, ASS1, DRD5, ONECUT2, HMGCS1, OXTR, KIT, RRM2B, PHIP, CEP57, BCHE, FAT4, SAFB, AGT, DNAJA1, TBC1D4, PCSK9, NR1H4, TRPC3, GNRH1, SMAD2, GJB2, CORO1A, EIF4E, NUP62, AVPR1A	0.571981	47.4558
GOTERM_BP_ALL	GO:0044706~multi-multicellular organism process	12	0.0332044	AR, CYP27B1, GNRH1, AGT, AVPR1A, OXTR, PRDX3, ACVR1C, GJB2, IHH, TAC3, MED1	0.572412	47.6552
GOTERM_BP_ALL	GO:0034308~primary alcohol metabolic process	5	0.0333122	AKR1C3, CHKA, LRAT, DGAT2, RDH5	0.571908	47.767
GOTERM_BP_ALL	GO:0010608~posttranscriptional regulation of gene expression	21	0.0337557	KHDRBS1, XPO1, EXOSC9, MAP2K1, DICER1, NANOS1, SMAD2, RPS6KB1, HSPA1B, FXR1, ATXN2, RPS6KA3, METTL14, EIF4E, DDX3X, DCP1A, TPR, EIF2AK2, TNPO1, RC3H1, HSPA8	0.575103	48.2245
GOTERM_BP_ALL	GO:0006413~translational initiation	11	0.0339207	KHDRBS1, ABCE1, EIF4E, DDX3X, RPL22, EIF1AX, DDX3Y, SSB, RPS6KB1, EIF2AK2, TPR	0.57522	48.3937
GOTERM_BP_ALL	GO:0051341~regulation of oxidoreductase activity	7	0.0341232	HSP90AA1, CYP27B1, NOS1AP, AGT, DRD5, NPR3, DDAH1	0.575742	48.6007
GOTERM_BP_ALL	GO:0001523~retinoid metabolic process	7	0.0341232	AKR1C3, APOA2, AKR1C4, LRAT, DGAT2, LRP8, RDH5	0.575742	48.6007
GOTERM_BP_ALL	GO:0010872~regulation of cholesterol esterification	3	0.0344119	APOA2, AGT, APOA5	0.57719	48.8944
GOTERM_BP_ALL	GO:2000650~negative regulation of sodium ion transmembrane transporter activity	3	0.0344119	AGT, PCSK9, STK39	0.57719	48.8944
GOTERM_BP_ALL	GO:0031325~positive regulation of cellular metabolic process	93	0.0359123	TBK1, GPBP1, RPS6KB1, CITED4, ACVR1C, AKR1C3, EPCAM, DDX17, APOA2, CASP8AP2, ZNF148, INSIG1, APOA5, PSIP1, OGT, HSF4, MYB, DDAH1, CCNA2, FRS2, RC3H1, CHUK, GNL3, IHH, KHDRBS1, CDK1, RAP2A, AR, EXOSC9, CCDC88A, MYO6, HSP90AA1, NOS1AP, SPTLC2, MINK1, FOXN2, HLTF, DDN, NLRP1, UBE2N, DGAT2, MTF2, PIAS1, EIF2AK2, NFE2L3, DCUN1D4, MED1, SMARCAD1, HMGB1, ASS1, SLC39A10, DRD5, ONECUT3, NANOS1, ONECUT2, N…	0.591373	50.3954
GOTERM_BP_ALL	GO:0000002~mitochondrial genome maintenance	4	0.0359128	DNA2, OPA1, POLG2, RRM2B	0.589713	50.3959
GOTERM_BP_ALL	GO:0008299~isoprenoid biosynthetic process	4	0.0359128	AKR1C3, HMGCS1, IDI1, FDFT1	0.589713	50.3959
GOTERM_BP_ALL	GO:0042632~cholesterol homeostasis	6	0.0372882	ABCG8, APOA2, DGAT2, APOA5, LIPG, PCSK9	0.602072	51.735
GOTERM_BP_ALL	GO:0055092~sterol homeostasis	6	0.0372882	ABCG8, APOA2, DGAT2, APOA5, LIPG, PCSK9	0.602072	51.735
GOTERM_BP_ALL	GO:0007569~cell aging	7	0.0374428	CDK1, OPA1, NUP62, MAP2K1, SMC5, ATR, WRN	0.601963	51.8833
GOTERM_BP_ALL	GO:0051726~regulation of cell cycle	37	0.0379655	XPO1, TIPIN, KIAA0101, TXLNG, RPS6KB1, KANK2, CUL3, PHIP, DDX3X, MDC1, TPR, DDIAS, ZWILCH, CCNA2, ASPM, HSPA8, FEN1, PRPF40A, KHDRBS1, CDK1, GTPBP4, MAP2K1, TRNP1, GMNN, SMC5, CENPE, ATAD5, FZD3, STXBP4, CENPJ, SMC3, ATF5, PLK4, CDKL1, EIF4E, MAP9, MED1	0.605499	52.3818
GOTERM_BP_ALL	GO:0051053~negative regulation of DNA metabolic process	8	0.0388237	ZNF93, GTPBP4, GMNN, TIPIN, ATR, ZRANB3, POLQ, SMC3	0.612226	53.1895
GOTERM_BP_ALL	GO:0018146~keratan sulfate biosynthetic process	4	0.0394358	ST3GAL6, CHST2, B3GNT3, B3GNT2	0.616454	53.7577
GOTERM_BP_ALL	GO:0015721~bile acid and bile salt transport	4	0.0394358	AKR1C4, ABCC3, SLC51A, NR1H4	0.616454	53.7577
GOTERM_BP_ALL	GO:0031297~replication fork processing	4	0.0394358	FANCM, WRN, ZRANB3, BOD1L1	0.616454	53.7577
GOTERM_BP_ALL	GO:0051641~cellular localization	84	0.0401226	XPO1, SYT4, ATL2, TIMM17A, SNRPD1, CD2AP, SSR1, CUL3, AKR1C3, HOOK1, NPAP1, SLMAP, COL4A3BP, INSIG1, PSIP1, SRRM1, ATP5O, YOD1, TPR, JPH1, ASPM, HTR1F, GNL3, KHDRBS1, ABCE1, CDK1, RAP2A, AR, OPA1, HSP90AA1, MYO6, CEP83, KIF5B, ANP32E, SPIRE1, STXBP4, DCTN6, NRXN1, PIGR, TIMM21, CTDSPL2, ARL3, THOC2, KPNA3, SNRPF, CPSF2, MED1, SRSF10, GDAP1, SRSF11, PPP6R3, CDH2, KIT, BLOC1S6, GPD1L, SUMO1, TUBB, …	0.621301	54.3873
GOTERM_BP_ALL	GO:1902306~negative regulation of sodium ion transmembrane transport	3	0.0405652	AGT, PCSK9, STK39	0.623797	54.7889
GOTERM_BP_ALL	GO:0034434~sterol esterification	3	0.0405652	APOA2, AGT, APOA5	0.623797	54.7889
GOTERM_BP_ALL	GO:0016264~gap junction assembly	3	0.0405652	AGT, GJB1, GJB2	0.623797	54.7889
GOTERM_BP_ALL	GO:0034433~steroid esterification	3	0.0405652	APOA2, AGT, APOA5	0.623797	54.7889
GOTERM_BP_ALL	GO:0034435~cholesterol esterification	3	0.0405652	APOA2, AGT, APOA5	0.623797	54.7889
GOTERM_BP_ALL	GO:0051649~establishment of localization in cell	68	0.041307	XPO1, ATL2, SYT4, TIMM17A, SNRPD1, SSR1, AKR1C3, HOOK1, CUL3, NPAP1, COL4A3BP, INSIG1, PSIP1, SRRM1, ATP5O, YOD1, TPR, JPH1, HTR1F, KHDRBS1, ABCE1, CDK1, OPA1, HSP90AA1, MYO6, CEP83, KIF5B, ANP32E, SPIRE1, STXBP4, DCTN6, NRXN1, TIMM21, CTDSPL2, ARL3, THOC2, KPNA3, SNRPF, CPSF2, MED1, SRSF10, GDAP1, SRSF11, PPP6R3, KIT, CDH2, BLOC1S6, TUBB, CEP57, GNPTAB, AGT, TBC1D4, TNPO1, HSPA8, NR1H4, NEMF, UP…	0.628987	55.4542
GOTERM_BP_ALL	GO:0001959~regulation of cytokine-mediated signaling pathway	9	0.0414608	SUMO1, IL1R1, OTULIN, HSPA1B, PIAS1, SLIT2, CHUK, NR1H4, MED1	0.628773	55.591
GOTERM_BP_ALL	GO:0048731~system development	134	0.0424206	CRYGS, XRCC2, SYT4, GABRB2, RPS6KB1, PNP, PRKX, KLHL1, CUL3, DDX17, APOA2, SRRM4, AQP11, COL4A3BP, AARD, INSIG1, APOA5, S1PR5, PTBP3, PTBP2, OGT, CCNA2, DDAH1, FRS2, RC3H1, ASPM, OPA1, KIF5B, MYH3, FOXN2, MGP, REC8, CDKL1, PRDM6, EIF2AK2, PRPS2, ADAMTS4, HMGB1, ASS1, ONECUT3, ONECUT2, ASTN1, HMGCS1, RRM2B, CX3CL1, NHS, BLOC1S6, BCHE, P2RY1, B3GNT2, POLQ, NR1H4, HELLS, GNRH1, EPAS1, MAP2K1, ATAD5,…	0.635773	56.4358
GOTERM_BP_ALL	GO:1901654~response to ketone	10	0.0427111	EIF4E, GNRH1, CATSPER2, ASS1, NASP, AVPR1A, OXTR, RPS6KB1, SLIT2, GJB2	0.636743	56.6884
GOTERM_BP_ALL	GO:0007568~aging	14	0.0428596	CDK1, OPA1, ASS1, MAP2K1, SLC12A2, GNRH1, SMC5, RPS6KB1, ATR, WRN, NUP62, AGT, P2RY1, CAT	0.636459	56.817
GOTERM_BP_ALL	GO:0070661~leukocyte proliferation	14	0.0428596	TNFRSF21, HMGB1, GNRH1, TBK1, SLC39A10, ATAD5, NPR3, KIT, PNP, CORO1A, TFRC, HELLS, RC3H1, IHH	0.636459	56.817
GOTERM_BP_ALL	GO:0006461~protein complex assembly	51	0.0446135	ATL2, COA4, CAPZA1, NAP1L1, CD2AP, UXS1, CUL3, ZNF148, AQP11, INSIG1, CAT, HSF4, TPR, CDK1, AR, HSP90AA1, OPA1, ANP32E, SPIRE1, NRXN1, SLIT2, TIMM21, THEG, USH1C, KPNA3, EIF2AK2, ATPAF1, SMARCAD1, HMGB1, TCAP, ACTR3B, NUFIP1, PPP6R3, CX3CL1, TFAM, SUMO1, DDX3X, CEP57, CENPC, POLQ, TNPO1, GMNN, NASP, SMAD2, HBA2, CENPE, CRYZ, CENPJ, GJB1, CORO1A, NUP62	0.649959	58.3089
GOTERM_BP_ALL	GO:0006814~sodium ion transport	11	0.0452109	GPD1L, KIF5B, SLC12A2, SLC17A4, AGT, SLMAP, PCSK9, SLC4A7, STK39, SLC4A4, GLRX	0.653385	58.8058
GOTERM_BP_ALL	GO:0070271~protein complex biogenesis	51	0.0453113	ATL2, COA4, CAPZA1, NAP1L1, CD2AP, UXS1, CUL3, ZNF148, AQP11, INSIG1, CAT, HSF4, TPR, CDK1, AR, HSP90AA1, OPA1, ANP32E, SPIRE1, NRXN1, SLIT2, TIMM21, THEG, USH1C, KPNA3, EIF2AK2, ATPAF1, SMARCAD1, HMGB1, TCAP, ACTR3B, NUFIP1, PPP6R3, CX3CL1, TFAM, SUMO1, DDX3X, CEP57, CENPC, POLQ, TNPO1, GMNN, NASP, SMAD2, HBA2, CENPE, CRYZ, CENPJ, GJB1, CORO1A, NUP62	0.652654	58.8888
GOTERM_BP_ALL	GO:1903428~positive regulation of reactive oxygen species biosynthetic process	5	0.0463904	HSP90AA1, NOS1AP, ASS1, AGT, DDAH1	0.65994	59.7704
GOTERM_BP_ALL	GO:0016101~diterpenoid metabolic process	7	0.0466209	AKR1C3, APOA2, AKR1C4, LRAT, DGAT2, LRP8, RDH5	0.660251	59.9564
GOTERM_BP_ALL	GO:1903038~negative regulation of leukocyte cell-cell adhesion	7	0.0466209	TNFRSF21, HMGB1, GNRH1, ASS1, RC3H1, LAG3, IHH	0.660251	59.9564
GOTERM_BP_ALL	GO:0042572~retinol metabolic process	4	0.0469852	AKR1C3, LRAT, DGAT2, RDH5	0.661631	60.2487
GOTERM_BP_ALL	GO:0019098~reproductive behavior	4	0.0469852	PPP1R1B, DRD5, AVPR1A, OXTR	0.661631	60.2487
GOTERM_BP_ALL	GO:0043928~exonucleolytic nuclear-transcribed mRNA catabolic process involved in deadenylation-dependent decay	4	0.0469852	PATL1, EXOSC9, DCP1A, LSM3	0.661631	60.2487
GOTERM_BP_ALL	GO:0033146~regulation of intracellular estrogen receptor signaling pathway	4	0.0469852	AR, DDX17, KANK2, MED1	0.661631	60.2487
GOTERM_BP_ALL	GO:0019725~cellular homeostasis	32	0.0471937	TMX1, HMGB1, SLC39A10, DRD5, TMX3, OXTR, NMB, PRDX3, AQP11, AGT, P2RY1, SLC4A7, OGT, SLC4A4, JPH1, HTR1F, NR1H4, GLRX, TRPC3, SLC12A2, KIF5B, ATP13A3, DNA2, ERP44, SCGN, CORO1A, TFRC, DGAT2, GTF2I, AVPR1A, FAM155A, CP	0.661756	60.4151
GOTERM_BP_ALL	GO:0010468~regulation of gene expression	135	0.0477228	XPO1, ZNF823, TBK1, RPS6KB1, CITED4, KANK2, CUL3, ESF1, DDX17, CDCA7, CASP8AP2, SRRM4, INSIG1, PSIP1, ZNF443, PTBP3, PTBP2, OGT, CCNA2, RC3H1, GNL3, MTERF1, MYO6, ZNF100, FOXN2, ZNF816, ELL2, CTDSPL2, SUZ12, SLTM, TRIM33, MTF2, PRDM6, DNTTIP2, PIAS1, NFE2L3, EIF2AK2, ZNF41, HMGB1, SRSF10, ONECUT3, ONECUT2, HSPA1B, TCERG1, DDX3X, P2RY1, DDX3Y, ARNTL2, NR1H4, HELLS, GNRH1, EPAS1, MAP2K1, TAF5, BRIP…	0.664414	60.8344
GOTERM_BP_ALL	GO:0006950~response to stress	116	0.0479947	XRCC2, TBK1, PGC, CAPZA1, RPS6KB1, SSR1, APOA2, COL4A3BP, INSIG1, APOA5, PSIP1, ZNF443, STK39, CCNA2, MYO6, OPA1, EEPD1, REC8, PIAS1, EIF2AK2, TMX1, HMGB1, IL1R1, ASS1, DRD5, TMX3, TIPIN, RRM2B, HSPA1B, CX3CL1, BLOC1S6, DAPL1, TUBB, PROCR, DDX3X, POLE2, P2RY1, DNAJA1, AHNAK2, POLQ, NR1H4, TUBB4B, TRPC3, EPAS1, MAP2K1, BRIP1, ATAD5, HBA2, WRN, ATR, DNA2, CORO1A, EIF4E, NUP62, AVPR1A, SUPT16H, RAD5…	0.665024	61.0482
GOTERM_BP_ALL	GO:0046637~regulation of alpha-beta T cell differentiation	5	0.0493028	HMGB1, MYB, PNP, RC3H1, IHH	0.673598	62.0615

## Sheet: miR-338 and miR-421 Up
Supplementary Table S2: miR-338-5p and miR-421 common upregulated biological processes predicted by DAVID analysis.
Category	Term	Count	PValue	Genes	Benjamini	FDR
GOTERM_BP_ALL	GO:0006342~chromatin silencing	14	2.05788e-08	HIST1H2AB, HIST2H2AA4, HIST1H2AD, HIST2H2AB, HIST2H2AC, HIST1H3B, HIST1H2AI, HIST1H2AH, HIST1H2AK, HIST1H4C, HIST3H2A, HIST1H2AJ, HIST1H2AM, HIST1H3G	7.9431e-05	3.80956e-05
GOTERM_BP_ALL	GO:0036003~positive regulation of transcription from RNA polymerase II promoter in response to stress	8	5.10457e-08	MUC1, ATF3, CEBPB, XBP1, VEGFA, KLF2, SESN2, DDIT3	9.85133e-05	9.4496e-05
GOTERM_BP_ALL	GO:0045892~negative regulation of transcription, DNA-templated	42	5.9689e-08	HIST1H2AB, THAP7, JDP2, HIST2H2AA4, TFCP2L1, HIST1H2AD, CBX4, TRIB3, SMTNL1, HIST2H2AB, TSC22D3, XBP1, HIST2H2AC, JUND, HIST3H2A, HIST1H4C, FOXD1, PITX2, CEBPA, MUC1, NACC2, CEBPB, TBX2, KLF10, DUSP22, ZNF8, SIX5, KAT5, CDK5, DDIT3, NCK2, ATF3, IRF7, VEGFA, HIST1H3B, HIST1H2AI, HIST1H2AH, HIST1H2AK, HIST1H2AJ, HIST1H2AM, HIST1H3G, PPP1R15A	7.67969e-05	0.000110496
GOTERM_BP_ALL	GO:2000113~negative regulation of cellular macromolecule biosynthetic process	46	8.29285e-08	HIST1H2AB, THAP7, NANOS3, JDP2, HIST2H2AA4, TFCP2L1, HIST1H2AD, CBX4, TRIB3, SMTNL1, SESN2, HIST2H2AB, TSC22D3, XBP1, HIST2H2AC, JUND, HIST3H2A, HIST1H4C, FOXD1, PITX2, CEBPA, MUC1, NACC2, CEBPB, TBX2, KLF10, DUSP22, ZNF8, SIX5, KAT5, CDK5, DDIT3, TARBP2, NCK2, ATF3, DUSP1, IRF7, VEGFA, HIST1H3B, HIST1H2AI, HIST1H2AH, HIST1H2AK, HIST1H2AJ, HIST1H2AM, HIST1H3G, PPP1R15A	8.00228e-05	0.000153517
GOTERM_BP_ALL	GO:0045814~negative regulation of gene expression, epigenetic	14	1.02284e-07	HIST1H2AB, HIST2H2AA4, HIST1H2AD, HIST2H2AB, HIST2H2AC, HIST1H3B, HIST1H2AI, HIST1H2AH, HIST1H2AK, HIST1H4C, HIST3H2A, HIST1H2AJ, HIST1H2AM, HIST1H3G	7.89599e-05	0.000189348
GOTERM_BP_ALL	GO:1903507~negative regulation of nucleic acid-templated transcription	42	1.80005e-07	HIST1H2AB, THAP7, JDP2, HIST2H2AA4, TFCP2L1, HIST1H2AD, CBX4, TRIB3, SMTNL1, HIST2H2AB, TSC22D3, XBP1, HIST2H2AC, JUND, HIST3H2A, HIST1H4C, FOXD1, PITX2, CEBPA, MUC1, NACC2, CEBPB, TBX2, KLF10, DUSP22, ZNF8, SIX5, KAT5, CDK5, DDIT3, NCK2, ATF3, IRF7, VEGFA, HIST1H3B, HIST1H2AI, HIST1H2AH, HIST1H2AK, HIST1H2AJ, HIST1H2AM, HIST1H3G, PPP1R15A	0.000115797	0.000333226
GOTERM_BP_ALL	GO:0010558~negative regulation of macromolecule biosynthetic process	47	2.26501e-07	HIST1H2AB, THAP7, NANOS3, JDP2, HIST2H2AA4, TFCP2L1, HIST1H2AD, CBX4, TRIB3, SMTNL1, SESN2, HIST2H2AB, TSC22D3, XBP1, HIST2H2AC, JUND, HIST3H2A, HIST1H4C, FOXD1, PITX2, CEBPA, MUC1, NACC2, CEBPB, TBX2, KLF10, DUSP22, ZNF8, SIX5, INHA, KAT5, CDK5, DDIT3, TARBP2, NCK2, ATF3, DUSP1, IRF7, VEGFA, HIST1H3B, HIST1H2AI, HIST1H2AH, HIST1H2AK, HIST1H2AJ, HIST1H2AM, HIST1H3G, PPP1R15A	0.000124891	0.000419299
GOTERM_BP_ALL	GO:1902679~negative regulation of RNA biosynthetic process	42	2.63744e-07	HIST1H2AB, THAP7, JDP2, HIST2H2AA4, TFCP2L1, HIST1H2AD, CBX4, TRIB3, SMTNL1, HIST2H2AB, TSC22D3, XBP1, HIST2H2AC, JUND, HIST3H2A, HIST1H4C, FOXD1, PITX2, CEBPA, MUC1, NACC2, CEBPB, TBX2, KLF10, DUSP22, ZNF8, SIX5, KAT5, CDK5, DDIT3, NCK2, ATF3, IRF7, VEGFA, HIST1H3B, HIST1H2AI, HIST1H2AH, HIST1H2AK, HIST1H2AJ, HIST1H2AM, HIST1H3G, PPP1R15A	0.000127248	0.000488242
GOTERM_BP_ALL	GO:0043618~regulation of transcription from RNA polymerase II promoter in response to stress	10	4.2019e-07	MUC1, NCK2, ATF3, CEBPB, XBP1, VEGFA, KLF2, SESN2, PPP1R15A, DDIT3	0.000180198	0.000777854
GOTERM_BP_ALL	GO:0051253~negative regulation of RNA metabolic process	42	7.1007e-07	HIST1H2AB, THAP7, JDP2, HIST2H2AA4, TFCP2L1, HIST1H2AD, CBX4, TRIB3, SMTNL1, HIST2H2AB, TSC22D3, XBP1, HIST2H2AC, JUND, HIST3H2A, HIST1H4C, FOXD1, PITX2, CEBPA, MUC1, NACC2, CEBPB, TBX2, KLF10, DUSP22, ZNF8, SIX5, KAT5, CDK5, DDIT3, NCK2, ATF3, IRF7, VEGFA, HIST1H3B, HIST1H2AI, HIST1H2AH, HIST1H2AK, HIST1H2AJ, HIST1H2AM, HIST1H3G, PPP1R15A	0.000274049	0.00131448
GOTERM_BP_ALL	GO:0031327~negative regulation of cellular biosynthetic process	47	7.64274e-07	HIST1H2AB, THAP7, NANOS3, JDP2, HIST2H2AA4, TFCP2L1, HIST1H2AD, CBX4, TRIB3, SMTNL1, SESN2, HIST2H2AB, TSC22D3, XBP1, HIST2H2AC, JUND, HIST3H2A, HIST1H4C, FOXD1, PITX2, CEBPA, MUC1, NACC2, CEBPB, TBX2, KLF10, DUSP22, ZNF8, SIX5, INHA, KAT5, CDK5, DDIT3, TARBP2, NCK2, ATF3, DUSP1, IRF7, VEGFA, HIST1H3B, HIST1H2AI, HIST1H2AH, HIST1H2AK, HIST1H2AJ, HIST1H2AM, HIST1H3G, PPP1R15A	0.000268155	0.00141482
GOTERM_BP_ALL	GO:0043620~regulation of DNA-templated transcription in response to stress	10	8.02132e-07	MUC1, NCK2, ATF3, CEBPB, XBP1, VEGFA, KLF2, SESN2, PPP1R15A, DDIT3	0.000257986	0.0014849
GOTERM_BP_ALL	GO:0010629~negative regulation of gene expression	47	8.39814e-07	HIST1H2AB, THAP7, NANOS3, JDP2, HIST2H2AA4, TFCP2L1, HIST1H2AD, CBX4, TRIB3, SMTNL1, SESN2, HIST2H2AB, TSC22D3, XBP1, HIST2H2AC, JUND, HIST3H2A, HIST1H4C, FOXD1, GBA, PITX2, CEBPA, MUC1, NACC2, CEBPB, TBX2, CHAC1, KLF10, DUSP22, ZNF8, SIX5, KAT5, CDK5, DDIT3, TARBP2, NCK2, ATF3, IRF7, VEGFA, HIST1H3B, HIST1H2AI, HIST1H2AH, HIST1H2AK, HIST1H2AJ, HIST1H2AM, HIST1H3G, PPP1R15A	0.000249329	0.00155466
GOTERM_BP_ALL	GO:0009890~negative regulation of biosynthetic process	47	1.19552e-06	HIST1H2AB, THAP7, NANOS3, JDP2, HIST2H2AA4, TFCP2L1, HIST1H2AD, CBX4, TRIB3, SMTNL1, SESN2, HIST2H2AB, TSC22D3, XBP1, HIST2H2AC, JUND, HIST3H2A, HIST1H4C, FOXD1, PITX2, CEBPA, MUC1, NACC2, CEBPB, TBX2, KLF10, DUSP22, ZNF8, SIX5, INHA, KAT5, CDK5, DDIT3, TARBP2, NCK2, ATF3, DUSP1, IRF7, VEGFA, HIST1H3B, HIST1H2AI, HIST1H2AH, HIST1H2AK, HIST1H2AJ, HIST1H2AM, HIST1H3G, PPP1R15A	0.000329569	0.00221313
GOTERM_BP_ALL	GO:0051172~negative regulation of nitrogen compound metabolic process	47	1.24024e-06	HIST1H2AB, THAP7, NANOS3, JDP2, HIST2H2AA4, TFCP2L1, HIST1H2AD, CBX4, TRIB3, COMT, SMTNL1, SESN2, HIST2H2AB, TSC22D3, XBP1, HIST2H2AC, JUND, HIST3H2A, HIST1H4C, FOXD1, PITX2, CEBPA, MUC1, NACC2, CEBPB, TBX2, KLF10, DUSP22, ZNF8, SIX5, KAT5, CDK5, DDIT3, TARBP2, NCK2, ATF3, DUSP1, IRF7, VEGFA, HIST1H3B, HIST1H2AI, HIST1H2AH, HIST1H2AK, HIST1H2AJ, HIST1H2AM, HIST1H3G, PPP1R15A	0.000319104	0.00229591
GOTERM_BP_ALL	GO:0045934~negative regulation of nucleobase-containing compound metabolic process	43	3.64828e-06	HIST1H2AB, THAP7, JDP2, HIST2H2AA4, TFCP2L1, HIST1H2AD, CBX4, TRIB3, SMTNL1, HIST2H2AB, TSC22D3, XBP1, HIST2H2AC, JUND, HIST3H2A, HIST1H4C, FOXD1, PITX2, CEBPA, MUC1, NACC2, CEBPB, TBX2, KLF10, DUSP22, ZNF8, SIX5, KAT5, CDK5, DDIT3, NCK2, ATF3, DUSP1, IRF7, VEGFA, HIST1H3B, HIST1H2AI, HIST1H2AH, HIST1H2AK, HIST1H2AJ, HIST1H2AM, HIST1H3G, PPP1R15A	0.000879763	0.00675351
GOTERM_BP_ALL	GO:0040029~regulation of gene expression, epigenetic	16	8.09819e-06	HIST1H2AB, HIST2H2AA4, HIST1H2AD, TARBP2, HIST2H2AB, HIST2H2AC, HIST1H2AI, HIST1H3B, HIST1H2AH, HIST1H2AK, HIST3H2A, HIST1H4C, HIST1H2AJ, HIST1H2AM, KLF2, HIST1H3G	0.00183708	0.0149903
GOTERM_BP_ALL	GO:0016458~gene silencing	15	2.26668e-05	HIST1H2AB, HIST2H2AA4, HIST1H2AD, HIST2H2AB, TARBP2, HIST2H2AC, HIST1H2AI, HIST1H3B, HIST1H2AH, HIST1H2AK, HIST3H2A, HIST1H4C, HIST1H2AJ, HIST1H2AM, HIST1H3G	0.00484902	0.0419525
GOTERM_BP_ALL	GO:0006325~chromatin organization	26	0.000162937	MUC1, HIST1H2AB, CENPM, HIST2H2AA4, JDP2, HIST1H2BC, HIST1H2BD, NACC2, HIST1H2AD, CBX4, KAT5, HIST2H2AB, HIST1H2BM, XBP1, HIST2H2AC, HIST1H2BI, VEGFA, HIST1H3B, HIST1H2AI, HIST1H2AH, HIST1H2AK, HIST1H4C, HIST3H2A, HIST1H2AJ, HIST1H2AM, HIST1H3G	0.0325626	0.301199
GOTERM_BP_ALL	GO:0034976~response to endoplasmic reticulum stress	14	0.000172845	NCK2, ATG10, CEBPB, ATF3, XBP1, CHAC1, FBXO2, AARS, TRIB3, DNAJB2, EEF2, SESN2, PPP1R15A, DDIT3	0.0328116	0.319488
GOTERM_BP_ALL	GO:0070059~intrinsic apoptotic signaling pathway in response to endoplasmic reticulum stress	7	0.000199058	NCK2, CEBPB, XBP1, CHAC1, TRIB3, PPP1R15A, DDIT3	0.0359309	0.367855
GOTERM_BP_ALL	GO:0031324~negative regulation of cellular metabolic process	56	0.000222866	JDP2, HIST2H2AA4, CBX4, HIST2H2AB, HIST2H2AC, HIST3H2A, RHOH, PITX2, CHAC1, ZNF8, SIX5, INHA, CDK5, DDIT3, TARBP2, NCK2, VEGFA, PPP1R15A, HIST1H2AB, THAP7, NANOS3, HIST1H2AD, TFCP2L1, DUSP10, TRIB3, COMT, SMTNL1, BDKRB2, SESN2, TSC22D3, XBP1, JUND, HIST1H4C, FOXD1, GBA, CEBPA, MUC1, NACC2, CEBPB, TBX2, KLF10, DUSP22, KAT5, FURIN, DUSP4, ATF3, DUSP1, IRF7, HIST1H3B, HIST1H2AI, HIST1H2AH, HIST1H2AK…	0.0383523	0.411766
GOTERM_BP_ALL	GO:0010605~negative regulation of macromolecule metabolic process	55	0.000333468	JDP2, HIST2H2AA4, CBX4, HIST2H2AB, GRIN2C, HIST2H2AC, HIST3H2A, PITX2, CHAC1, ZNF8, SIX5, INHA, CDK5, DDIT3, TARBP2, NCK2, VEGFA, PPP1R15A, HIST1H2AB, THAP7, NANOS3, TFCP2L1, HIST1H2AD, DUSP10, TRIB3, SMTNL1, BDKRB2, SESN2, TSC22D3, XBP1, JUND, HIST1H4C, FOXD1, GBA, CEBPA, MUC1, NACC2, CEBPB, TBX2, KLF10, DUSP22, KAT5, FURIN, DUSP4, ATF3, DUSP1, IRF7, HIST1H3B, HIST1H2AI, HIST1H2AH, HIST1H2AK, DN…	0.0544362	0.615518
GOTERM_BP_ALL	GO:0006984~ER-nucleus signaling pathway	6	0.000490706	NCK2, ATG10, ATF3, XBP1, PPP1R15A, DDIT3	0.0759057	0.904504
GOTERM_BP_ALL	GO:1990440~positive regulation of transcription from RNA polymerase II promoter in response to endoplasmic reticulum stress	4	0.000619642	ATF3, CEBPB, XBP1, DDIT3	0.0912655	1.14088
GOTERM_BP_ALL	GO:0009892~negative regulation of metabolic process	57	0.000767549	JDP2, HIST2H2AA4, CBX4, HIST2H2AB, GRIN2C, HIST2H2AC, HIST3H2A, RHOH, PITX2, CHAC1, ZNF8, SIX5, INHA, CDK5, DDIT3, TARBP2, NCK2, VEGFA, PPP1R15A, HIST1H2AB, THAP7, NANOS3, HIST1H2AD, TFCP2L1, DUSP10, TRIB3, COMT, SMTNL1, BDKRB2, SESN2, TSC22D3, XBP1, JUND, HIST1H4C, FOXD1, GBA, CEBPA, MUC1, NACC2, CEBPB, TBX2, KLF10, DUSP22, KAT5, FURIN, DUSP4, ATF3, DUSP1, IRF7, HIST1H3B, HIST1H2AI, HIST1H2AH, H…	0.107738	1.41138
GOTERM_BP_ALL	GO:0048523~negative regulation of cellular process	86	0.00104561	HIST2H2AA4, JDP2, CHMP4C, LMO4, CBX4, SDC4, ISG20, HIST2H2AB, PACSIN2, HIST2H2AC, TMSB15B, RHOB, HIST3H2A, PITX2, RHOH, PTGER4, CHAC1, AARS, PRKAB1, ZNF8, SIX5, INHA, CDK5, DDIT3, TARBP2, RAB11FIP5, PYCR1, NCK2, ALOX15B, CLIC4, TBRG1, VEGFA, GIPR, BTG3, PPP1R15A, ADAM15, HIST1H2AB, NANOS3, THAP7, WNT5B, HIST1H2AD, TFCP2L1, CRLF1, DUSP10, TRIB3, COMT, BDKRB2, SMTNL1, SESN2, ADA, TSC22D3, PFN4, XBP…	0.138915	1.91802
GOTERM_BP_ALL	GO:1903532~positive regulation of secretion by cell	14	0.00109995	CD244, PTGER4, BAD, INHA, IL17RC, PCK2, SDC4, CDK5, RETN, KCNN4, XBP1, ALOX15B, CD58, GIPR	0.140771	2.01674
GOTERM_BP_ALL	GO:0033554~cellular response to stress	43	0.00116895	ATG10, DUSP10, TRIB3, COMT, BDKRB2, SESN2, KCNMB1, MUTYH, LAMB2, XBP1, SLC2A1, RHOB, HIST3H2A, HIST1H4C, GBA, MUC1, CEBPB, NACC2, PTGER4, TBX2, CHAC1, KLF10, AP5S1, AARS, FBXO2, DUSP22, EEF2, BAD, KAT5, DDIT3, NCK2, MPG, PYCR1, ATF3, IRF7, VEGFA, GADD45G, TOP3A, DNAJB2, PARP3, NFE2L1, KLF2, PPP1R15A	0.144169	2.14197
GOTERM_BP_ALL	GO:0045598~regulation of fat cell differentiation	8	0.00130688	CEBPA, JDP2, WNT5B, CEBPB, XBP1, DUSP10, TRIB3, DDIT3	0.154868	2.39182
GOTERM_BP_ALL	GO:0046903~secretion	30	0.00150536	CYB5R1, CD244, NAAA, CHMP6, COMT, BDKRB2, SDC4, IL17RC, ADA, EXOC3L4, XBP1, SLC2A1, CFD, FOXD1, RSG1, PTGER4, BAD, INHA, PCK2, CDK5, FURIN, KCNN4, RETN, RAB11FIP5, ALOX15B, CD58, VEGFA, GIPR, VAMP5, PLA2G2C	0.17104	2.7503
GOTERM_BP_ALL	GO:0051047~positive regulation of secretion	14	0.00230022	CD244, PTGER4, BAD, INHA, IL17RC, PCK2, SDC4, CDK5, RETN, KCNN4, XBP1, ALOX15B, CD58, GIPR	0.24254	4.1735
GOTERM_BP_ALL	GO:0051276~chromosome organization	31	0.00234762	HIST1H2AB, JDP2, HIST2H2AA4, CHMP4C, HIST1H2AD, CHMP6, CBX4, HIST2H2AB, HIST1H2BM, XBP1, HIST1H2BI, HIST2H2AC, HIST1H4C, HIST3H2A, MUC1, HIST1H2BC, CENPM, NACC2, HIST1H2BD, KAT5, DUSP1, VEGFA, TOP3A, HIST1H3B, HIST1H2AI, HIST1H2AH, PARP3, HIST1H2AK, HIST1H2AJ, HIST1H2AM, HIST1H3G	0.24037	4.25774
GOTERM_BP_ALL	GO:0048519~negative regulation of biological process	89	0.0027143	HIST2H2AA4, JDP2, CHMP4C, LMO4, CBX4, SDC4, ISG20, HIST2H2AB, GRIN2C, PACSIN2, HIST2H2AC, TMSB15B, RHOB, HIST3H2A, PITX2, RHOH, PTGER4, CHAC1, AARS, PRKAB1, ZNF8, SIX5, INHA, CDK5, DDIT3, RETN, TARBP2, RAB11FIP5, PYCR1, NCK2, ALOX15B, CLIC4, TBRG1, VEGFA, GIPR, BTG3, PPP1R15A, ADAM15, HIST1H2AB, NANOS3, THAP7, WNT5B, HIST1H2AD, TFCP2L1, CRLF1, DUSP10, TRIB3, COMT, BDKRB2, SMTNL1, SESN2, ADA, TSC2…	0.265505	4.90708
GOTERM_BP_ALL	GO:0001101~response to acid chemical	12	0.00272851	MUC1, WNT5B, CEBPB, DUSP1, XBP1, IGF2R, GIPR, AARS, EEF2, BAD, SESN2, KCNMB1	0.260165	4.93216
GOTERM_BP_ALL	GO:0036499~PERK-mediated unfolded protein response	4	0.00339857	NCK2, ATF3, PPP1R15A, DDIT3	0.305819	6.10768
GOTERM_BP_ALL	GO:0032940~secretion by cell	26	0.00414372	CYB5R1, CD244, NAAA, CHMP6, SDC4, IL17RC, EXOC3L4, XBP1, SLC2A1, CFD, FOXD1, RSG1, PTGER4, BAD, INHA, PCK2, CDK5, FURIN, RAB11FIP5, RETN, KCNN4, ALOX15B, CD58, VEGFA, GIPR, VAMP5	0.351562	7.3988
GOTERM_BP_ALL	GO:0036490~regulation of translation in response to endoplasmic reticulum stress	3	0.00427613	NCK2, SESN2, PPP1R15A	0.352927	7.62647
GOTERM_BP_ALL	GO:0042326~negative regulation of phosphorylation	15	0.00433756	CEBPA, DUSP10, DUSP22, TRIB3, INHA, BDKRB2, DUSP4, NCK2, TARBP2, ATF3, DUSP1, XBP1, PPP1R15A, RHOH, GBA	0.349648	7.73191
GOTERM_BP_ALL	GO:0050714~positive regulation of protein secretion	10	0.00438174	KCNN4, CD244, PTGER4, XBP1, ALOX15B, CD58, GIPR, BAD, PCK2, IL17RC	0.345424	7.80767
GOTERM_BP_ALL	GO:0034728~nucleosome organization	9	0.00477499	HIST1H2BM, CENPM, HIST1H2BC, HIST1H2BD, HIST1H2BI, HIST1H3B, HIST3H2A, HIST1H4C, HIST1H3G	0.36277	8.47945
GOTERM_BP_ALL	GO:0051046~regulation of secretion	20	0.00574057	RSG1, CD244, PTGER4, CHMP6, BAD, INHA, COMT, IL17RC, PCK2, SDC4, CDK5, ADA, RAB11FIP5, RETN, KCNN4, ALOX15B, XBP1, CD58, SLC2A1, GIPR	0.410869	10.1093
GOTERM_BP_ALL	GO:0000188~inactivation of MAPK activity	4	0.00629581	DUSP4, DUSP1, DUSP10, DUSP22	0.432745	11.0341
GOTERM_BP_ALL	GO:0006334~nucleosome assembly	8	0.00689851	HIST1H2BM, CENPM, HIST1H2BC, HIST1H2BD, HIST1H2BI, HIST1H3B, HIST1H4C, HIST1H3G	0.455172	12.0277
GOTERM_BP_ALL	GO:0000122~negative regulation of transcription from RNA polymerase II promoter	21	0.00705615	CEBPA, JDP2, NACC2, TBX2, TFCP2L1, KLF10, CBX4, DUSP22, TRIB3, ZNF8, KAT5, DDIT3, NCK2, TSC22D3, ATF3, XBP1, IRF7, JUND, VEGFA, PPP1R15A, PITX2	0.455238	12.2858
GOTERM_BP_ALL	GO:0006333~chromatin assembly or disassembly	9	0.00726083	HIST1H2BM, CENPM, HIST1H2BC, HIST1H2BD, HIST1H2BI, HIST1H3B, HIST3H2A, HIST1H4C, HIST1H3G	0.457464	12.62
GOTERM_BP_ALL	GO:0048469~cell maturation	8	0.00739563	CEBPA, RAC3, XBP1, TFCP2L1, VEGFA, LHX6, KLF2, PCSK4	0.456455	12.8393
GOTERM_BP_ALL	GO:0097193~intrinsic apoptotic signaling pathway	11	0.00825775	MUC1, NCK2, NACC2, CEBPB, XBP1, CHAC1, TRIB3, BAD, BDKRB2, PPP1R15A, DDIT3	0.48666	14.2301
GOTERM_BP_ALL	GO:0045444~fat cell differentiation	9	0.00864949	CEBPA, RETN, JDP2, WNT5B, CEBPB, XBP1, DUSP10, TRIB3, DDIT3	0.495573	14.8552
GOTERM_BP_ALL	GO:0046085~adenosine metabolic process	3	0.00890125	PTGDR, CECR1, ADA	0.498551	15.2545
GOTERM_BP_ALL	GO:0042542~response to hydrogen peroxide	7	0.0102687	PYCR1, DUSP1, RHOB, EEF2, BAD, KLF2, ADA	0.542154	17.3932
GOTERM_BP_ALL	GO:1900102~negative regulation of endoplasmic reticulum unfolded protein response	3	0.0107749	NCK2, XBP1, PPP1R15A	0.552541	18.1718
GOTERM_BP_ALL	GO:1903530~regulation of secretion by cell	18	0.0116378	RSG1, CD244, PTGER4, CHMP6, BAD, INHA, IL17RC, PCK2, SDC4, CDK5, RETN, KCNN4, RAB11FIP5, ALOX15B, XBP1, CD58, SLC2A1, GIPR	0.573676	19.4831
GOTERM_BP_ALL	GO:0031497~chromatin assembly	8	0.0116508	HIST1H2BM, CENPM, HIST1H2BC, HIST1H2BD, HIST1H2BI, HIST1H3B, HIST1H4C, HIST1H3G	0.567297	19.5026
GOTERM_BP_ALL	GO:0021522~spinal cord motor neuron differentiation	4	0.0122571	HOXC10, LMO4, IFT172, TCTN1	0.579175	20.4119
GOTERM_BP_ALL	GO:0044283~small molecule biosynthetic process	15	0.0130712	TM7SF2, CD244, FADS3, PRKAB1, FADS2, TRIB3, SESN2, ASL, PCK2, COQ6, PYCR1, ATF3, ALOX15B, XBP1, GBA	0.596234	21.6175
GOTERM_BP_ALL	GO:0006950~response to stress	70	0.0131645	IL17RC, SDC4, ISG20, MUTYH, GRIN2C, HIST1H2BI, SLC2A1, RHOB, HIST3H2A, CFD, NMNAT3, NUDT2, PTGER4, CHAC1, AARS, EEF2, CDK5, DDIT3, HLA-F, TARBP2, PYCR1, NCK2, GADD45G, PTGDR, VEGFA, GIPR, TOP3A, NFE2L1, PPP1R15A, ADAM15, GGCX, ATG10, CD244, WNT5B, DUSP10, TRIB3, COMT, BDKRB2, SESN2, ADA, KCNMB1, TSC22D3, LAMB2, XBP1, HIST1H4C, GBA, MUC1, HIST1H2BC, HIST1H2BD, NACC2, CEBPB, TBX2, KLF10, AP5S1, FBX…	0.592375	21.7545
GOTERM_BP_ALL	GO:0001933~negative regulation of protein phosphorylation	13	0.0132993	CEBPA, TARBP2, NCK2, DUSP4, ATF3, DUSP1, XBP1, DUSP10, DUSP22, TRIB3, BDKRB2, PPP1R15A, GBA	0.589768	21.9523
GOTERM_BP_ALL	GO:0006986~response to unfolded protein	8	0.0135301	NCK2, ATF3, XBP1, CHAC1, AARS, DNAJB2, PPP1R15A, DDIT3	0.58985	22.2895
GOTERM_BP_ALL	GO:0050715~positive regulation of cytokine secretion	6	0.0140313	CD244, PTGER4, XBP1, ALOX15B, CD58, IL17RC	0.597103	23.0172
GOTERM_BP_ALL	GO:0006082~organic acid metabolic process	23	0.0141779	NMNAT3, CARS, ACY1, AARS, FADS3, PRKAB1, TRIB3, FADS2, SLC22A11, COMT, SESN2, PCK2, ASL, SLC7A5, MTHFD2, PYCR1, ALOX15B, XBP1, SLC2A1, IDH2, GNMT, LIPE, MARS	0.594883	23.2288
GOTERM_BP_ALL	GO:0031667~response to nutrient levels	13	0.0163059	KLF10, EEF2, COMT, ADA, DDIT3, ATF3, SLC25A25, XBP1, GIPR, SLC2A1, ARSA, PITX2, GBA	0.640681	26.2393
GOTERM_BP_ALL	GO:0048534~hematopoietic or lymphoid organ development	20	0.0205839	CEBPA, CEBPB, PTGER4, ACP6, KLF10, LMO4, EEF2, BAD, INHA, ADA, EML1, WDR78, XBP1, IRF7, VEGFA, NFE2L1, HIST1H4C, KLF2, PITX2, RHOH	0.720382	31.9567
GOTERM_BP_ALL	GO:0035966~response to topologically incorrect protein	8	0.0209965	NCK2, ATF3, XBP1, CHAC1, AARS, DNAJB2, PPP1R15A, DDIT3	0.721917	32.4855
GOTERM_BP_ALL	GO:0043407~negative regulation of MAP kinase activity	5	0.021282	DUSP4, DUSP1, DUSP10, DUSP22, GBA	0.721256	32.8489
GOTERM_BP_ALL	GO:0045786~negative regulation of cell cycle	14	0.0214859	CEBPA, MUC1, NACC2, CHMP4C, PRKAB1, INHA, CDK5, DDIT3, DUSP1, ALOX15B, TBRG1, BTG3, RHOB, PPP1R15A	0.719252	33.1075
GOTERM_BP_ALL	GO:0043409~negative regulation of MAPK cascade	7	0.0225716	DUSP4, ATF3, DUSP1, XBP1, DUSP10, DUSP22, GBA	0.731605	34.4682
GOTERM_BP_ALL	GO:0021700~developmental maturation	9	0.023279	CEBPA, RAC3, XBP1, TFCP2L1, VEGFA, LHX6, KLF2, DDIT3, PCSK4	0.73738	35.3406
GOTERM_BP_ALL	GO:1901700~response to oxygen-containing compound	32	0.0242922	WNT5B, DUSP10, TRIB3, COMT, SESN2, KCNMB1, ADA, XBP1, JUND, RHOB, GBA, MUC1, NUDT2, CEBPB, PTGER4, KLF10, AARS, EEF2, BAD, KAT5, PCK2, CDK5, AGTRAP, RETN, RAB11FIP5, PYCR1, DUSP1, IGF2R, GIPR, ARSA, FBXO32, KLF2	0.747346	36.5711
GOTERM_BP_ALL	GO:0032434~regulation of proteasomal ubiquitin-dependent protein catabolic process	6	0.0245348	CEBPA, XBP1, TRIB3, DDA1, DNAJB2, GBA	0.74584	36.8624
GOTERM_BP_ALL	GO:2001242~regulation of intrinsic apoptotic signaling pathway	7	0.0245996	MUC1, NCK2, NACC2, XBP1, BAD, BDKRB2, DDIT3	0.741824	36.9401
GOTERM_BP_ALL	GO:0042594~response to starvation	7	0.0253018	ATF3, XBP1, KLF10, SLC2A1, COMT, DDIT3, GBA	0.746886	37.7752
GOTERM_BP_ALL	GO:0001654~eye development	11	0.0258599	SMG9, WNT5B, LAMB2, SLC25A25, WDPCP, TBX2, CLIC4, B9D1, VEGFA, SIX5, PITX2	0.74977	38.4314
GOTERM_BP_ALL	GO:0043010~camera-type eye development	10	0.0264285	WNT5B, LAMB2, SLC25A25, WDPCP, TBX2, CLIC4, B9D1, VEGFA, SIX5, PITX2	0.75269	39.0933
GOTERM_BP_ALL	GO:0090066~regulation of anatomical structure size	14	0.0265342	EVL, SMTNL1, BDKRB2, CDK5, PEX11G, KCNMB1, KCNN4, NCK2, CDC42EP1, PFN4, CAPG, VEGFA, PTGDR, TMSB15B	0.749444	39.2156
GOTERM_BP_ALL	GO:0009991~response to extracellular stimulus	13	0.0268785	KLF10, EEF2, COMT, ADA, DDIT3, ATF3, SLC25A25, XBP1, GIPR, SLC2A1, ARSA, PITX2, GBA	0.749382	39.6123
GOTERM_BP_ALL	GO:0044281~small molecule metabolic process	40	0.0270849	TM7SF2, CD244, TRIB3, SLC22A11, COMT, ASL, SESN2, SLC7A5, ADA, MTHFD2, SLC25A25, XBP1, SLC2A1, IDH2, FUT1, GNMT, GBA, MARS, CEBPA, NMNAT3, CARS, NUDT18, ACY1, AARS, FADS3, PRKAB1, CECR1, FADS2, BAD, PCK2, COQ6, GUCY2D, NDUFV3, PYCR1, ATF3, ALOX15B, GIPR, PTGDR, VEGFA, LIPE	0.747537	39.849
GOTERM_BP_ALL	GO:0009267~cellular response to starvation	6	0.0271102	ATF3, XBP1, KLF10, SLC2A1, COMT, GBA	0.743372	39.8779
GOTERM_BP_ALL	GO:0031333~negative regulation of protein complex assembly	6	0.0280054	PTGER4, PFN4, LMO4, TMSB15B, CAPG, GBA	0.750399	40.8939
GOTERM_BP_ALL	GO:0060986~endocrine hormone secretion	4	0.0280589	RAB11FIP5, RETN, INHA, FOXD1	0.746704	40.954
GOTERM_BP_ALL	GO:0060271~cilium morphogenesis	9	0.0294615	RSG1, WDPCP, RSPH1, B9D1, ZMYND10, IFT172, TCTN1, PIH1D3, TTLL1	0.759508	42.5117
GOTERM_BP_ALL	GO:0021517~ventral spinal cord development	4	0.0297005	HOXC10, LMO4, IFT172, TCTN1	0.758112	42.7732
GOTERM_BP_ALL	GO:0051592~response to calcium ion	6	0.0298518	DUSP1, CLIC4, JUND, GIPR, BAD, KCNMB1	0.755718	42.9381
GOTERM_BP_ALL	GO:0045936~negative regulation of phosphate metabolic process	15	0.0298793	CEBPA, DUSP10, DUSP22, TRIB3, INHA, BDKRB2, DUSP4, NCK2, TARBP2, ATF3, DUSP1, XBP1, PPP1R15A, RHOH, GBA	0.751908	42.9681
GOTERM_BP_ALL	GO:0010563~negative regulation of phosphorus metabolic process	15	0.0298793	CEBPA, DUSP10, DUSP22, TRIB3, INHA, BDKRB2, DUSP4, NCK2, TARBP2, ATF3, DUSP1, XBP1, PPP1R15A, RHOH, GBA	0.751908	42.9681
GOTERM_BP_ALL	GO:0050708~regulation of protein secretion	12	0.0301252	RAB11FIP5, KCNN4, CD244, PTGER4, XBP1, ALOX15B, CD58, SLC2A1, GIPR, BAD, PCK2, IL17RC	0.750692	43.2351
GOTERM_BP_ALL	GO:0010033~response to organic substance	54	0.030494	IL17RC, ISG20, PITX2, PTGER4, CHAC1, AARS, SLC3A2, ZNF8, EEF2, CDK5, DDIT3, HLA-F, RETN, NCK2, RAB11FIP5, TARBP2, MED16, IGF2R, GIPR, PTGDR, VEGFA, ESRP1, PPP1R15A, WNT5B, DUSP10, TRIB3, COMT, SESN2, KCNMB1, ADA, XBP1, JUND, FOXD1, GBA, CEBPA, MUC1, CEBPB, KLF10, FBXO2, DUSP22, BAD, KAT5, PCK2, FURIN, AGTRAP, ATF3, DUSP1, IRF7, CD58, ARSA, DNAJB2, FBXO32, KLF2, FEZ1	0.750921	43.6333
GOTERM_BP_ALL	GO:0006979~response to oxidative stress	12	0.0309378	PYCR1, NUDT2, DUSP1, XBP1, RHOB, NFE2L1, EEF2, BAD, KLF2, SESN2, ADA, GBA	0.751999	44.1091
GOTERM_BP_ALL	GO:0006152~purine nucleoside catabolic process	3	0.0310262	NUDT18, CECR1, ADA	0.749045	44.2034
GOTERM_BP_ALL	GO:0046130~purine ribonucleoside catabolic process	3	0.0310262	NUDT18, CECR1, ADA	0.749045	44.2034
GOTERM_BP_ALL	GO:0006520~cellular amino acid metabolic process	9	0.0313313	NMNAT3, PYCR1, CARS, ACY1, AARS, GNMT, ASL, SLC7A5, MARS	0.748574	44.5277
GOTERM_BP_ALL	GO:0006323~DNA packaging	8	0.0314779	HIST1H2BM, CENPM, HIST1H2BC, HIST1H2BD, HIST1H2BI, HIST1H3B, HIST1H4C, HIST1H3G	0.746339	44.683
GOTERM_BP_ALL	GO:0042384~cilium assembly	8	0.0324156	RSG1, WDPCP, RSPH1, B9D1, ZMYND10, IFT172, PIH1D3, TTLL1	0.752853	45.666
GOTERM_BP_ALL	GO:0006461~protein complex assembly	31	0.032839	ZMYND10, CHMP6, LMO4, ASL, HIST1H2BM, CCT6B, CDC42EP1, PFN4, HIST1H2BI, TMSB15B, SLC2A1, HIST1H4C, GNMT, GBA, HIST1H2BC, CENPM, NACC2, HIST1H2BD, PTGER4, PRKAB1, EVL, BAD, KAT5, PIH1D3, NDUFV3, NCK2, VEGFA, CAPG, HIST1H3B, KCTD15, HIST1H3G	0.753634	46.1044
GOTERM_BP_ALL	GO:0070271~protein complex biogenesis	31	0.0331001	ZMYND10, CHMP6, LMO4, ASL, HIST1H2BM, CCT6B, CDC42EP1, PFN4, HIST1H2BI, TMSB15B, SLC2A1, HIST1H4C, GNMT, GBA, HIST1H2BC, CENPM, NACC2, HIST1H2BD, PTGER4, PRKAB1, EVL, BAD, KAT5, PIH1D3, NDUFV3, NCK2, VEGFA, CAPG, HIST1H3B, KCTD15, HIST1H3G	0.752683	46.3732
GOTERM_BP_ALL	GO:0002520~immune system development	20	0.0334695	CEBPA, CEBPB, PTGER4, ACP6, KLF10, LMO4, EEF2, BAD, INHA, ADA, EML1, WDR78, XBP1, IRF7, VEGFA, NFE2L1, HIST1H4C, KLF2, PITX2, RHOH	0.752888	46.7512
GOTERM_BP_ALL	GO:0043555~regulation of translation in response to stress	3	0.0341464	NCK2, SESN2, PPP1R15A	0.756263	47.4374
GOTERM_BP_ALL	GO:0019752~carboxylic acid metabolic process	20	0.0348879	NMNAT3, CARS, ACY1, AARS, FADS3, PRKAB1, TRIB3, FADS2, SESN2, PCK2, ASL, SLC7A5, PYCR1, ALOX15B, XBP1, SLC2A1, IDH2, GNMT, LIPE, MARS	0.760173	48.1793
GOTERM_BP_ALL	GO:0043603~cellular amide metabolic process	23	0.0352827	CEBPA, NANOS3, CARS, ACY1, CHAC1, AARS, EEF2, SESN2, ASL, FURIN, NCSTN, MTHFD2, TARBP2, NCK2, LARP6, TRNAU1AP, SLC25A25, CLIC4, SLC25A35, NEU1, PPP1R15A, GBA, MARS	0.760547	48.5704
GOTERM_BP_ALL	GO:0000302~response to reactive oxygen species	8	0.0353701	PYCR1, NUDT2, DUSP1, RHOB, EEF2, BAD, KLF2, ADA	0.757895	48.6565
GOTERM_BP_ALL	GO:0010498~proteasomal protein catabolic process	12	0.0358104	CEBPA, UBXN11, XBP1, FBXO2, TRIB3, FBXL22, DDA1, DNAJB2, FBXO15, KAT5, DDIT3, GBA	0.758735	49.0887
GOTERM_BP_ALL	GO:0043436~oxoacid metabolic process	20	0.0369745	NMNAT3, CARS, ACY1, AARS, FADS3, PRKAB1, TRIB3, FADS2, SESN2, PCK2, ASL, SLC7A5, PYCR1, ALOX15B, XBP1, SLC2A1, IDH2, GNMT, LIPE, MARS	0.766429	50.2146
GOTERM_BP_ALL	GO:0060429~epithelium development	24	0.0384584	MUC1, CEBPB, WNT5B, TBX2, TFCP2L1, LMO4, B9D1, CRLF1, AARS, BAD, SDC4, ATP2C2, LAMB2, WDPCP, ALOX15B, CLIC4, XBP1, IFT172, VEGFA, RHOB, TCTN1, KLF2, FOXD1, PITX2	0.776603	51.6157
GOTERM_BP_ALL	GO:0051222~positive regulation of protein transport	13	0.0390525	CD244, CYB5R1, PTGER4, BAD, IL17RC, PCK2, CDK5, OSCP1, KCNN4, ALOX15B, XBP1, CD58, GIPR	0.778537	52.1661
GOTERM_BP_ALL	GO:0071901~negative regulation of protein serine/threonine kinase activity	6	0.0390989	CEBPA, DUSP4, DUSP1, DUSP10, DUSP22, GBA	0.775678	52.2089
GOTERM_BP_ALL	GO:0060562~epithelial tube morphogenesis	10	0.0391382	TBX2, CLIC4, LMO4, IFT172, VEGFA, RHOB, TCTN1, SDC4, FOXD1, PITX2	0.772776	52.245
GOTERM_BP_ALL	GO:1901654~response to ketone	7	0.0393674	DUSP1, PTGER4, FBXO32, BAD, PCK2, KLF2, GBA	0.771559	52.4555
GOTERM_BP_ALL	GO:0071824~protein-DNA complex subunit organization	9	0.03959	HIST1H2BM, CENPM, HIST1H2BC, HIST1H2BD, HIST1H2BI, HIST1H3B, HIST3H2A, HIST1H4C, HIST1H3G	0.770301	52.659
GOTERM_BP_ALL	GO:1901565~organonitrogen compound catabolic process	11	0.0412208	NUDT18, ACY1, GGACT, CHAC1, CECR1, NEU1, COMT, SDC4, ASL, ADA, GBA	0.78097	54.1252
GOTERM_BP_ALL	GO:0021953~central nervous system neuron differentiation	7	0.0422693	HOXC10, RAC3, LMO4, IFT172, LHX6, TCTN1, CDK5	0.786388	55.0451
GOTERM_BP_ALL	GO:0021515~cell differentiation in spinal cord	4	0.0425722	HOXC10, LMO4, IFT172, TCTN1	0.785755	55.3076
GOTERM_BP_ALL	GO:0045600~positive regulation of fat cell differentiation	4	0.0425722	CEBPA, WNT5B, CEBPB, XBP1	0.785755	55.3076
GOTERM_BP_ALL	GO:0035082~axoneme assembly	4	0.0425722	RSPH1, ZMYND10, PIH1D3, TTLL1	0.785755	55.3076
GOTERM_BP_ALL	GO:0008585~female gonad development	5	0.0432361	RETN, CEBPB, VEGFA, INHA, PITX2	0.787958	55.8778
GOTERM_BP_ALL	GO:0006154~adenosine catabolic process	2	0.0433113	CECR1, ADA	0.785561	55.942
GOTERM_BP_ALL	GO:0046103~inosine biosynthetic process	2	0.0433113	CECR1, ADA	0.785561	55.942
GOTERM_BP_ALL	GO:0045007~depurination	2	0.0433113	MPG, MUTYH	0.785561	55.942
GOTERM_BP_ALL	GO:0030097~hemopoiesis	18	0.0445821	CEBPA, CEBPB, PTGER4, ACP6, KLF10, EEF2, BAD, INHA, ADA, EML1, WDR78, XBP1, IRF7, VEGFA, NFE2L1, HIST1H4C, KLF2, RHOH	0.792327	57.0128
GOTERM_BP_ALL	GO:0030968~endoplasmic reticulum unfolded protein response	6	0.0449127	NCK2, ATF3, XBP1, AARS, PPP1R15A, DDIT3	0.791894	57.2874
GOTERM_BP_ALL	GO:0030031~cell projection assembly	12	0.0451614	NCK2, RSG1, CDC42EP1, WDPCP, RAC3, RSPH1, B9D1, ZMYND10, IFT172, EVL, PIH1D3, TTLL1	0.790861	57.4928
GOTERM_BP_ALL	GO:0031400~negative regulation of protein modification process	15	0.0458504	CEBPA, DUSP10, DUSP22, TRIB3, BDKRB2, CDK5, DUSP4, NCK2, TARBP2, ATF3, DUSP1, XBP1, DNAJB2, PPP1R15A, GBA	0.793071	58.0571
GOTERM_BP_ALL	GO:0048732~gland development	12	0.0460957	CEBPA, ATP2C2, CEBPB, XBP1, ALOX15B, TBX2, LMO4, IGF2R, TFCP2L1, VEGFA, ADA, PITX2	0.792028	58.2562
GOTERM_BP_ALL	GO:0043933~macromolecular complex subunit organization	47	0.046436	HIST1H2AB, JDP2, HIST2H2AA4, ZMYND10, HIST1H2AD, LMO4, CHMP6, CBX4, ASL, HIST2H2AB, HIST1H2BM, CDC42EP1, CCT6B, PFN4, XBP1, HIST1H2BI, HIST2H2AC, TMSB15B, SLC2A1, HIST3H2A, HIST1H4C, GNMT, GBA, MUC1, HIST1H2BC, CENPM, HIST1H2BD, NACC2, PTGER4, PRKAB1, EVL, BAD, PIH1D3, KAT5, NDUFV3, TARBP2, NCK2, VEGFA, CAPG, HIST1H3B, HIST1H2AI, HIST1H2AH, KCTD15, HIST1H2AK, HIST1H2AJ, HIST1H2AM, HIST1H3G	0.791685	58.531
GOTERM_BP_ALL	GO:2001244~positive regulation of intrinsic apoptotic signaling pathway	4	0.0466855	NCK2, NACC2, BAD, DDIT3	0.790696	58.7314
GOTERM_BP_ALL	GO:0044257~cellular protein catabolic process	17	0.0469674	CEBPA, UBXN11, CHMP4C, FBXO2, TRIB3, KAT5, FURIN, DDIT3, XBP1, RNF11, FBXL22, DDA1, FBXO32, DNAJB2, FBXO15, GBA, CTSF	0.789952	58.9567
GOTERM_BP_ALL	GO:0048872~homeostasis of number of cells	8	0.0472904	NCSTN, TSC22D3, RAC3, VEGFA, NFE2L1, INHA, KLF2, ADA	0.789511	59.2135
GOTERM_BP_ALL	GO:0044767~single-organism developmental process	94	0.047299	CHMP4C, LMO4, ERMARD, RADIL, SDC4, TTLL1, SLC7A5, PCDH1, PSKH1, SLC25A25, WDR78, RSPH1, PACSIN2, MTURN, RHOB, PITX2, RHOH, PTGER4, CHAC1, AARS, CECR1, SIX5, EEF2, INHA, PIH1D3, CDK5, DDIT3, HOXC10, RETN, TARBP2, NCK2, HOXC12, ATP2C2, EML1, ALOX15B, CLIC4, IGF2R, GADD45G, VEGFA, PTGDR, GIPR, VAMP5, NFE2L1, ADAM15, NANOS3, WNT5B, ACP6, B9D1, ZMYND10, TFCP2L1, MRAS, CRLF1, DUSP10, SMTNL1, ADA, KCNMB…	0.786843	59.2203
GOTERM_BP_ALL	GO:0034620~cellular response to unfolded protein	6	0.0486362	NCK2, ATF3, XBP1, AARS, PPP1R15A, DDIT3	0.793509	60.267
GOTERM_BP_ALL	GO:0042311~vasodilation	4	0.048813	PTGDR, SMTNL1, BDKRB2, KCNMB1	0.79206	60.4034
GOTERM_BP_ALL	GO:0046545~development of primary female sexual characteristics	5	0.0493609	RETN, CEBPB, VEGFA, INHA, PITX2	0.793153	60.8235
GOTERM_BP_ALL	GO:0033993~response to lipid	20	0.0497581	MUC1, WNT5B, CEBPB, PTGER4, DUSP10, EEF2, BAD, COMT, KAT5, PCK2, KCNMB1, DUSP1, XBP1, MED16, IGF2R, JUND, GIPR, FBXO32, PITX2, GBA	0.793215	61.1255
